# Supplementary material for: RNAi Screen Indicates Widespread Biological Function for Human Natural Antisense Transcripts
Source: PLoS One. 2010 Oct 4;5(10):e13177. doi: 10.1371/journal.pone.0013177 (PMC2949395; doi:10.1371/journal.pone.0013177)
Supplement: Table S2 — Raw data from the RNAi screen. Luciferase intensity prior to normalization for each well on the microtiter plates. (0.30 MB XLS) [file pone.0013177.s002.xls]

## Sheet: Raw signals
plate	well	siRNA	target	replicate 1	replicate 2
1	A01	AA005024-1	AA005024	1.12054e+06	1.31556e+06
1	A02	AI492449-2	AI492449	1.61887e+06	1.81602e+06
1	A03	AA009975-1	AA009975	1.3922e+06	2.08636e+06
1	A04	AI567466-3	AI567466	1.80808e+06	1.49373e+06
1	A05	AA009975-1	AA009975	1.83814e+06	1.52294e+06
1	A06	AI567466-1	AI567466	1.1661e+06	1.57247e+06
1	A07	AA009975-2	AA009975	1.32413e+06	1.60606e+06
1	A08	AI567466-2	AI567466	1.51759e+06	1.46837e+06
1	A09	AA019366-3	AA019366	1.4802e+06	1.18301e+06
1	A10	AI570582-3	AI570582	1.2241e+06	1.25471e+06
1	A11	AA019366-1	AA019366	826008	1.17616e+06
1	A12	AI570582-1	AI570582	938578	1.36004e+06
1	A13	AA019366-2	AA019366	1.76256e+06	1.00884e+06
1	A14	AI570582-2	AI570582	2.12966e+06	849876
1	A15	AA043058-3	AA043058	1.86671e+06	1.43429e+06
1	A16	AI580817-3	AI580817	972073	1666570
1	A17	AA043058-1	AA043058	2.2562e+06	1349130
1	A18	AI580817-1	AI580817	1.73386e+06	1.0045e+06
1	A19	AA043058-2	AA043058	1.53212e+06	1.24294e+06
1	A20	AI580817-2	AI580817	1.37406e+06	1.5093e+06
1	A21	AA131530-3	AA131530	1.16457e+06	1.18118e+06
1	A22	AI742769-3	AI742769	983253	824278
1	A23	AA131530-1	AA131530	923274	1.19194e+06
1	A24	AI742769-1	AI742769	749263	974883
1	B01	AK027096-1	AK027096	1.18733e+06	987702
1	B02	AK057964-1	AK057964	1.66371e+06	1.16413e+06
1	B03	AK027139-1	AK027139	1.40663e+06	1115795
1	B04	AK074733-1	AK074733	1.79035e+06	949480
1	B05	AK027139-1	AK027139	1.54669e+06	1.55156e+06
1	B06	AK075038-1	AK075038	916240	726907
1	B07	AK027139-2	AK027139	1.29604e+06	1.23709e+06
1	B08	AK075038-1	AK075038	2.04581e+06	1.47358e+06
1	B09	AK027412-3	AK027412	1.34065e+06	1.76426e+06
1	B10	AK075038-2	AK075038	1.44078e+06	1531458
1	B11	AK027412-1	AK027412	1.45447e+06	1.23181e+06
1	B12	AK075145-3	AK075145	2776674	2.05766e+06
1	B13	AK027412-2	AK027412	1.63117e+06	644866
1	B14	AK075145-1	AK075145	1.26827e+06	1349885
1	B15	AK027573-3	AK027573	2.15716e+06	2.03747e+06
1	B16	AK075145-2	AK075145	1.35968e+06	1.12322e+06
1	B17	AK027703-1	AK027703	2.08216e+06	1.54087e+06
1	B18	AK075399-3	AK075399	2.41341e+06	1.12641e+06
1	B19	AK027703-1	AK027703	1.80534e+06	1055425
1	B20	AK075399-1	AK075399	1.11104e+06	927246
1	B21	AK027703-2	AK027703	1.97488e+06	520511
1	B22	AK075399-2	AK075399	990290	909440
1	B23	AK027721-3	AK027721	1.46428e+06	935511
1	B24	AK090466-3	AK090466	758022	640901
1	C01	AA131530-2	AA131530	1.54759e+06	2.09909e+06
1	C02	AI742769-2	AI742769	2.14503e+06	1.9423e+06
1	C03	AA187445-3	AA187445	1.5553e+06	1729420
1	C04	AI802084-3	AI802084	1.88929e+06	1.41327e+06
1	C05	AA187445-1	AA187445	1.75379e+06	1.41479e+06
1	C06	AI807828-1	AI807828	1.52618e+06	1.49641e+06
1	C07	AA187445-2	AA187445	1.50058e+06	1.53283e+06
1	C08	AI807828-1	AI807828	1.99278e+06	1.18947e+06
1	C09	AA211156-3	AA211156	1.30622e+06	1.93566e+06
1	C10	AI807828-2	AI807828	2.14271e+06	1.92763e+06
1	C11	AA258335-1	AA258335	2.09308e+06	1.52787e+06
1	C12	AI831895-3	AI831895	2595193	2.30331e+06
1	C13	AA258335-1	AA258335	2.17992e+06	1921232
1	C14	AI833003-1	AI833003	2.83459e+06	1.97279e+06
1	C15	AA258335-2	AA258335	1.80502e+06	1.48668e+06
1	C16	AI833003-1	AI833003	3.52076e+06	2389566
1	C17	AA262100-3	AA262100	1.70756e+06	1.24429e+06
1	C18	AI833003-2	AI833003	2.74422e+06	1.7605e+06
1	C19	AA262100-1	AA262100	2.04782e+06	967587
1	C20	AI859398-3	AI859398	1.66624e+06	1.01244e+06
1	C21	AA262100-2	AA262100	1.56283e+06	1.37419e+06
1	C22	AI859398-1	AI859398	1488964	1.59171e+06
1	C23	AA286944-3	AA286944	1.86678e+06	1.25806e+06
1	C24	AI859398-2	AI859398	1.75753e+06	1.30774e+06
1	D01	AK027721-1	AK027721	1.04032e+06	436273
1	D02	AK090466-1	AK090466	1.817e+06	940726
1	D03	AK027721-2	AK027721	1.9341e+06	1.25236e+06
1	D04	AK090594-2	AK090594	1998370	726091
1	D05	AK027791-3	AK027791	1.60077e+06	542224
1	D06	AK090594-1	AK090594	2.28039e+06	992975
1	D07	AK027791-1	AK027791	1.31015e+06	1.21852e+06
1	D08	AK090594-2	AK090594	1458514	1113010
1	D09	AK027791-2	AK027791	2490656	1.13296e+06
1	D10	AK091030-3	AK091030	1.71062e+06	1.12488e+06
1	D11	AK054731-3	AK054731	1.77375e+06	1587701
1	D12	AK091030-1	AK091030	2.30574e+06	1.29354e+06
1	D13	AK054731-1	AK054731	2.58671e+06	1.63163e+06
1	D14	AK091030-2	AK091030	2.44399e+06	1.22955e+06
1	D15	AK054731-2	AK054731	1.94485e+06	631693
1	D16	AK091145-3	AK091145	1882500	1.18065e+06
1	D17	AK054757-3	AK054757	2782069	1.74446e+06
1	D18	AK091145-1	AK091145	1.84242e+06	1204587
1	D19	AK054757-1	AK054757	3.06224e+06	1.43104e+06
1	D20	AK091145-2	AK091145	2490206	1.38761e+06
1	D21	AK054757-2	AK054757	2.00025e+06	1.31018e+06
1	D22	AK091226-3	AK091226	2.43607e+06	1.16724e+06
1	D23	AK055014-3	AK055014	1.26578e+06	1.57814e+06
1	D24	AK091226-1	AK091226	1.67683e+06	630416
1	E01	AA331511-1	AA331511	1.10254e+06	2.02734e+06
1	E02	AI915980-3	AI915980	1.72903e+06	842931
1	E03	AA393374-1	AA393374	1.63959e+06	1.69378e+06
1	E04	AI915980-1	AI915980	1784815	1.53135e+06
1	E05	AA394287-1	AA394287	1584276	1.15675e+06
1	E06	AI915980-2	AI915980	1.7514e+06	1.53592e+06
1	E07	AA405140-1	AA405140	2.05642e+06	1.88973e+06
1	E08	AI928047-3	AI928047	2.01729e+06	1.42765e+06
1	E09	AA426524-1	AA426524	1.92507e+06	2.24637e+06
1	E10	AI936688-1	AI936688	1.52586e+06	1.44365e+06
1	E11	AA426598-1	AA426598	1.51367e+06	1.88647e+06
1	E12	AI936688-1	AI936688	1.56161e+06	1.5442e+06
1	E13	AA426598-1	AA426598	2.05586e+06	2.03074e+06
1	E14	AI942468-2	AI942468	1.91882e+06	1.4055e+06
1	E15	AA426598-2	AA426598	2.16346e+06	1.72315e+06
1	E16	AI942468-1	AI942468	1.5619e+06	1.57953e+06
1	E17	AA441812-3	AA441812	1.8838e+06	1.911e+06
1	E18	AI962439-2	AI962439	1.77222e+06	1.50305e+06
1	E19	AA442575-1	AA442575	1.82143e+06	1.41555e+06
1	E20	AI962439-1	AI962439	1714180	1.17146e+06
1	E21	AA442575-1	AA442575	1.46005e+06	1.51053e+06
1	E22	AI962439-2	AI962439	1.46741e+06	1.67167e+06
1	E23	AA442575-2	AA442575	1.77337e+06	1.20561e+06
1	E24	AI968300-3	AI968300	1.52654e+06	1.30737e+06
1	F01	AK055014-1	AK055014	1359407	NA
1	F02	AK091226-2	AK091226	1635002	NA
1	F03	AK055014-2	AK055014	1.83571e+06	NA
1	F04	AK091371-3	AK091371	1.36178e+06	NA
1	F05	AK055282-3	AK055282	1.92906e+06	NA
1	F06	AK091371-1	AK091371	1.38953e+06	NA
1	F07	AK055282-1	AK055282	2.04743e+06	NA
1	F08	AK091371-2	AK091371	1.60306e+06	NA
1	F09	AK055282-2	AK055282	2708538	NA
1	F10	AK091545-3	AK091545	1.44606e+06	NA
1	F11	AK055354-3	AK055354	2876718	NA
1	F12	AK091545-1	AK091545	1986072	NA
1	F13	AK055354-1	AK055354	2207572	NA
1	F14	AK091545-2	AK091545	2.24181e+06	NA
1	F15	AK055354-2	AK055354	1.75131e+06	NA
1	F16	AK091635-3	AK091635	3.00178e+06	NA
1	F17	AK055364-3	AK055364	2.07974e+06	NA
1	F18	AK091635-1	AK091635	1.73052e+06	NA
1	F19	AK055364-1	AK055364	1.37747e+06	NA
1	F20	AK091635-2	AK091635	1.63921e+06	NA
1	F21	AK055364-2	AK055364	2.12466e+06	NA
1	F22	AK091644-3	AK091644	1.07288e+06	NA
1	F23	AK055389-3	AK055389	1.84374e+06	NA
1	F24	AK091644-1	AK091644	1.23244e+06	NA
1	G01	AA526937-3	AA526937	1.16238e+06	2.43376e+06
1	G02	AI968300-1	AI968300	1.43276e+06	2.20572e+06
1	G03	AA526937-1	AA526937	1.85793e+06	1.35309e+06
1	G04	AI968300-2	AI968300	1717631	2422498
1	G05	AA526937-2	AA526937	1.57913e+06	1.45047e+06
1	G06	AJ420436-3	AJ420436	1.10713e+06	1.44788e+06
1	G07	AA825341-3	AA825341	1.45667e+06	1.79057e+06
1	G08	AK001285-1	AK001285	2.1808e+06	2.2366e+06
1	G09	AA825341-1	AA825341	1.58071e+06	1.44266e+06
1	G10	AK001285-1	AK001285	1.30708e+06	1.61997e+06
1	G11	AA825341-2	AA825341	1.78509e+06	1.6898e+06
1	G12	AK001285-2	AK001285	1.95341e+06	1.43551e+06
1	G13	AA836419-3	AA836419	2.63062e+06	1.50019e+06
1	G14	AK001491-3	AK001491	1.71953e+06	1.45903e+06
1	G15	AA889134-1	AA889134	2.37759e+06	1.65698e+06
1	G16	AK001497-1	AK001497	1.5137e+06	1.32779e+06
1	G17	AB096248-1	AB096248	1.97318e+06	1.53572e+06
1	G18	AK001497-1	AK001497	1.98061e+06	1.47309e+06
1	G19	AB096248-1	AB096248	1.92852e+06	1.77568e+06
1	G20	AK001497-2	AK001497	1.96847e+06	1.42063e+06
1	G21	AB096248-2	AB096248	2.32352e+06	1715481
1	G22	AK001838-3	AK001838	1.61221e+06	1.38481e+06
1	G23	AB096251-3	AB096251	2.27993e+06	1657008
1	G24	AK001838-1	AK001838	1.7483e+06	1.25157e+06
1	H01	AK055389-1	AK055389	867726	782703
1	H02	AK091644-2	AK091644	1.22712e+06	800924
1	H03	AK055389-2	AK055389	1.09164e+06	713806
1	H04	AK091674-3	AK091674	1.51054e+06	641056
1	H05	AK055438-3	AK055438	1178425	543062
1	H06	AK091674-1	AK091674	1.19734e+06	784076
1	H07	AK055438-1	AK055438	1.19732e+06	822966
1	H08	AK091674-2	AK091674	1.42709e+06	680001
1	H09	AK055438-2	AK055438	2127662	1114605
1	H10	AK091692-3	AK091692	1.50622e+06	1.21092e+06
1	H11	AK055458-3	AK055458	1.92824e+06	1.0879e+06
1	H12	AK091858-1	AK091858	1.57736e+06	1.08794e+06
1	H13	AK055458-1	AK055458	2058342	1.2662e+06
1	H14	AK091858-1	AK091858	1.79833e+06	1.63809e+06
1	H15	AK055458-2	AK055458	1.69083e+06	1.02468e+06
1	H16	AK091858-2	AK091858	1.65944e+06	1.07337e+06
1	H17	AK055459-3	AK055459	2.10293e+06	1.45629e+06
1	H18	AK091985-3	AK091985	1.53084e+06	1175536
1	H19	AK055459-1	AK055459	1.44803e+06	1.73733e+06
1	H20	AK091985-1	AK091985	1.35831e+06	960947
1	H21	AK055459-2	AK055459	2373122	1.44808e+06
1	H22	AK091985-2	AK091985	1.55293e+06	1.02035e+06
1	H23	AK055656-3	AK055656	1.57581e+06	572732
1	H24	AK092007-3	AK092007	886990	1.86301e+06
1	I01	AF015188-1	AF015188	908031	670228
1	I02	AK001838-2	AK001838	1.31476e+06	1694734
1	I03	AF054996-1	AF054996	1.68554e+06	1.00404e+06
1	I04	AK002006-3	AK002006	1.50791e+06	2.1131e+06
1	I05	AF054996-1	AF054996	1.23824e+06	2.11306e+06
1	I06	AK002073-1	AK002073	1.24143e+06	1689195
1	I07	AF054996-2	AF054996	1.53185e+06	2.27539e+06
1	I08	AK002073-1	AK002073	1.30886e+06	1.38025e+06
1	I09	AF070604-3	AF070604	1.74375e+06	1.92994e+06
1	I10	AK002073-2	AK002073	1.58772e+06	2.3102e+06
1	I11	AF070642-1	AF070642	1.73625e+06	1.87286e+06
1	I12	AK022798-3	AK022798	2.124e+06	2880307
1	I13	AF070642-1	AF070642	1650595	1.75063e+06
1	I14	AK022798-1	AK022798	1709215	1.86982e+06
1	I15	AF070642-2	AF070642	1.51297e+06	1.24548e+06
1	I16	AK022798-2	AK022798	1988737	2.24045e+06
1	I17	AF086182-3	AF086182	2350131	2.34147e+06
1	I18	AK022993-3	AK022993	1.26875e+06	1.41359e+06
1	I19	AF131741-1	AF131741	1.43701e+06	1.66195e+06
1	I20	AK022993-1	AK022993	1.32018e+06	2161752
1	I21	AF131741-1	AF131741	1894892	2.21418e+06
1	I22	AK022993-2	AK022993	1.48068e+06	1.68835e+06
1	I23	AF131741-2	AF131741	1.29808e+06	1.77422e+06
1	I24	AK023083-3	AK023083	871937	1.80916e+06
1	J01	AK055691-1	AK055691	1.30236e+06	1.30934e+06
1	J02	AK092007-1	AK092007	2.06624e+06	1.98149e+06
1	J03	AK055691-1	AK055691	1.71184e+06	2.07468e+06
1	J04	AK092007-2	AK092007	1.08372e+06	1.39787e+06
1	J05	AK055691-2	AK055691	1.08643e+06	1551742
1	J06	AK092035-3	AK092035	1.14351e+06	1.48894e+06
1	J07	AK055939-3	AK055939	1.0781e+06	1.07261e+06
1	J08	AK092035-1	AK092035	1.35857e+06	1.29141e+06
1	J09	AK055939-1	AK055939	1.80983e+06	1532439
1	J10	AK092035-2	AK092035	1.0305e+06	1.26782e+06
1	J11	AK055939-2	AK055939	1225051	1.31342e+06
1	J12	AK092039-3	AK092039	1.53574e+06	1.40825e+06
1	J13	AK056019-3	AK056019	1360631	1.31467e+06
1	J14	AK092039-1	AK092039	1308103	1192538
1	J15	AK056019-1	AK056019	1.36659e+06	1.09162e+06
1	J16	AK092039-2	AK092039	1426921	1.41492e+06
1	J17	AK056019-2	AK056019	1545838	1.23402e+06
1	J18	AK092113-3	AK092113	1.63884e+06	1.34975e+06
1	J19	AK056178-3	AK056178	2.1778e+06	1305153
1	J20	AK092113-1	AK092113	1.08135e+06	1.13526e+06
1	J21	AK056178-1	AK056178	1.57545e+06	820424
1	J22	AK092113-2	AK092113	946289	1.04625e+06
1	J23	AK056178-2	AK056178	883547	1.27337e+06
1	J24	AK092163-3	AK092163	722441	803900
1	K01	AF143875-3	AF143875	514391	1030746
1	K02	AK023083-1	AK023083	2.11911e+06	1.33648e+06
1	K03	AF143875-1	AF143875	2.06002e+06	2.98646e+06
1	K04	AK023083-2	AK023083	2.06571e+06	3696555
1	K05	AF143875-2	AF143875	2.16189e+06	1.80879e+06
1	K06	AK023682-3	AK023682	1.72193e+06	2.45291e+06
1	K07	AF147311-3	AF147311	2.3189e+06	1.93804e+06
1	K08	AK023682-1	AK023682	1.85024e+06	3.22102e+06
1	K09	AF147311-1	AF147311	2.49743e+06	2.67915e+06
1	K10	AK023682-2	AK023682	2153917	1.97324e+06
1	K11	AF147311-2	AF147311	2575807	2757366
1	K12	AK023699-3	AK023699	2.27058e+06	2064757
1	K13	AF290475-3	AF290475	2.00593e+06	2.76441e+06
1	K14	AK023699-1	AK023699	1.79009e+06	2590205
1	K15	AF339775-1	AF339775	1.96601e+06	1.77459e+06
1	K16	AK023699-2	AK023699	1.41817e+06	1.70647e+06
1	K17	AF339775-1	AF339775	1.9696e+06	1.71864e+06
1	K18	AK024764-3	AK024764	1.32685e+06	1.48293e+06
1	K19	AF339775-2	AF339775	1.36607e+06	1.60575e+06
1	K20	AK024764-1	AK024764	1.15553e+06	1.1415e+06
1	K21	AI018197-3	AI018197	815358	1.01285e+06
1	K22	AK024764-2	AK024764	1180330	1.47935e+06
1	K23	AI026698-1	AI026698	1.03273e+06	1.47004e+06
1	K24	AK025189-3	AK025189	736926	1.45145e+06
1	L01	AK056186-3	AK056186	1.76402e+06	2.11809e+06
1	L02	AK092163-1	AK092163	1.49253e+06	1.20227e+06
1	L03	AK056186-1	AK056186	2.04752e+06	1550533
1	L04	AK092163-2	AK092163	1.48319e+06	1.55877e+06
1	L05	AK056186-2	AK056186	1.50435e+06	1.48019e+06
1	L06	AK092372-3	AK092372	2.03237e+06	1619448
1	L07	AK056250-3	AK056250	2.32808e+06	2.33221e+06
1	L08	AK092448-1	AK092448	1.33031e+06	1.27782e+06
1	L09	AK056250-1	AK056250	1.57468e+06	1.7171e+06
1	L10	AK092448-1	AK092448	1504117	1.57333e+06
1	L11	AK056250-2	AK056250	1.95056e+06	1.70576e+06
1	L12	AK092448-2	AK092448	1.38851e+06	1.60779e+06
1	L13	AK056377-3	AK056377	1.95085e+06	1502908
1	L14	AK092603-3	AK092603	1.55938e+06	1.19577e+06
1	L15	AK056377-1	AK056377	1.64705e+06	1.97218e+06
1	L16	AK092603-1	AK092603	2.40098e+06	2.03034e+06
1	L17	AK056377-2	AK056377	1.82534e+06	1.70017e+06
1	L18	AK092603-2	AK092603	1.41995e+06	1.89417e+06
1	L19	AK056405-3	AK056405	1.34927e+06	1629979
1	L20	AK092738-3	AK092738	1.82507e+06	1.9614e+06
1	L21	AK056405-1	AK056405	2349374	2.05663e+06
1	L22	AK092738-1	AK092738	1690307	1.81869e+06
1	L23	AK056405-2	AK056405	1.62286e+06	1861451
1	L24	AK092738-2	AK092738	1669122	530958
1	M01	AI026698-1	AI026698	1.19226e+06	NA
1	M02	AK025189-1	AK025189	1.32703e+06	NA
1	M03	AI026698-2	AI026698	1.39743e+06	NA
1	M04	AK025189-2	AK025189	1.09328e+06	NA
1	M05	AI081835-3	AI081835	1.34506e+06	NA
1	M06	AK025262-3	AK025262	1.30159e+06	NA
1	M07	AI081835-1	AI081835	826049	NA
1	M08	AK025706-1	AK025706	1.11585e+06	NA
1	M09	AI081835-2	AI081835	1.17889e+06	NA
1	M10	AK025706-1	AK025706	1.24093e+06	NA
1	M11	AI142075-3	AI142075	1.21554e+06	NA
1	M12	AK025706-2	AK025706	1.67671e+06	NA
1	M13	AI205792-1	AI205792	1.64436e+06	NA
1	M14	AK025739-3	AK025739	1.06351e+06	NA
1	M15	AI208901-1	AI208901	1.16624e+06	NA
1	M16	AK025790-1	AK025790	1.26526e+06	NA
1	M17	AI208901-1	AI208901	1.12405e+06	NA
1	M18	AK025790-1	AK025790	870968	NA
1	M19	AI208901-2	AI208901	964407	NA
1	M20	AK025790-2	AK025790	733247	NA
1	M21	GL3	GL3	279325	NA
1	M22	GL3	GL3	257596	NA
1	M23	GL3	GL3	254428	NA
1	M24	GL3	GL3	172230	NA
1	N01	AK056550-3	AK056550	1.32066e+06	NA
1	N02	AK093026-3	AK093026	1096293	NA
1	N03	AK056550-1	AK056550	1.46521e+06	NA
1	N04	AK093026-1	AK093026	1.14294e+06	NA
1	N05	AK056550-2	AK056550	1.08477e+06	NA
1	N06	AK093026-2	AK093026	928663	NA
1	N07	AK056642-3	AK056642	642084	NA
1	N08	AK093138-3	AK093138	678937	NA
1	N09	AK056642-1	AK056642	665500	NA
1	N10	AK093138-1	AK093138	511953	NA
1	N11	AK056642-2	AK056642	646571	NA
1	N12	AK093138-2	AK093138	629852	NA
1	N13	AK056831-3	AK056831	579101	NA
1	N14	AK093233-3	AK093233	367870	NA
1	N15	AK056831-1	AK056831	573287	NA
1	N16	AK093233-1	AK093233	634579	NA
1	N17	AK056831-2	AK056831	618700	NA
1	N18	AK093233-2	AK093233	650852	NA
1	N19	AK056849-3	AK056849	395702	NA
1	N20	AK093397-3	AK093397	435434	NA
1	N21	GL3	GL3	178533	NA
1	N22	GL3	GL3	187942	NA
1	N23	GL3	GL3	182176	NA
1	N24	GL3	GL3	100470	NA
1	O01	AI291485-3	AI291485	1.10108e+06	754302
1	O02	AK025856-3	AK025856	1.24446e+06	1.28827e+06
1	O03	AI291485-1	AI291485	1121243	2.06917e+06
1	O04	AK025856-1	AK025856	1.71864e+06	2.62882e+06
1	O05	AI291485-2	AI291485	2.70593e+06	2.50712e+06
1	O06	AK025856-2	AK025856	1.59716e+06	1.71096e+06
1	O07	AI344951-3	AI344951	1.50311e+06	1.55717e+06
1	O08	AK026524-3	AK026524	2.38201e+06	3.45079e+06
1	O09	AI420884-1	AI420884	1.81432e+06	2.52579e+06
1	O10	AK026524-1	AK026524	1.72593e+06	2.20455e+06
1	O11	AI457472-1	AI457472	1.19323e+06	1748295
1	O12	AK026524-2	AK026524	2.37382e+06	1.82677e+06
1	O13	AI457472-1	AI457472	2.14471e+06	2.12173e+06
1	O14	AK026594-3	AK026594	1.50056e+06	1.44809e+06
1	O15	AI457472-2	AI457472	1.46946e+06	1.80999e+06
1	O16	AK026594-1	AK026594	1399634	1.91796e+06
1	O17	AI492449-3	AI492449	1.17211e+06	1.87455e+06
1	O18	AK026594-2	AK026594	1.8548e+06	2.23413e+06
1	O19	AI492449-1	AI492449	1.50185e+06	2.11332e+06
1	O20	AK026929-3	AK026929	757009	1.73932e+06
1	O21	GL3	GL3	218315	96227.4
1	O22	GL3	GL3	324331	99877
1	O23	mock	mock	644979	1.19199e+06
1	O24	mock	mock	562823	1136122
1	P01	AK056849-1	AK056849	1.44238e+06	408591
1	P02	AK093627-1	AK093627	1.21882e+06	1.43292e+06
1	P03	AK056849-2	AK056849	1508564	1693311
1	P04	AK093627-1	AK093627	1.09712e+06	1.14187e+06
1	P05	AK057183-3	AK057183	1.35582e+06	1.47517e+06
1	P06	AK093627-2	AK093627	1.51687e+06	1.7021e+06
1	P07	AK057183-1	AK057183	2.09172e+06	2.03364e+06
1	P08	AK093733-3	AK093733	1887558	1.39172e+06
1	P09	AK057183-2	AK057183	2.0655e+06	2.5398e+06
1	P10	AK093733-1	AK093733	1.13893e+06	1.14002e+06
1	P11	AK057528-3	AK057528	1.94592e+06	1.7302e+06
1	P12	AK093733-2	AK093733	1.29439e+06	1.34921e+06
1	P13	AK057676-1	AK057676	827248	1.1454e+06
1	P14	AK093737-3	AK093737	1100202	1.38817e+06
1	P15	AK057676-1	AK057676	1.65146e+06	1.54307e+06
1	P16	AK093737-1	AK093737	1.65068e+06	1.27226e+06
1	P17	AK057676-2	AK057676	1.60288e+06	1767284
1	P18	AK093737-2	AK093737	1.2231e+06	1.78361e+06
1	P19	AK057903-3	AK057903	2.5229e+06	2.51685e+06
1	P20	AK093774-3	AK093774	1.01721e+06	1.58013e+06
1	P21	GL3	GL3	260301	91553.6
1	P22	GL3	GL3	238473	63715.2
1	P23	mock	mock	896439	1.16417e+06
1	P24	mock	mock	1.0201e+06	1.38962e+06
2	A01	AK094046-1	AK094046	1.57608e+06	1.14156e+06
2	A02	AK097705-2	AK097705	1549935	633378
2	A03	AK094046-1	AK094046	2.68122e+06	400592
2	A04	AK097710-3	AK097710	3.3504e+06	2193113
2	A05	AK094046-2	AK094046	3.19948e+06	1136310
2	A06	AK097710-1	AK097710	1.3696e+06	583830
2	A07	AK094229-3	AK094229	1.83292e+06	1.01307e+06
2	A08	AK097710-2	AK097710	2.68077e+06	1.6638e+06
2	A09	AK094229-1	AK094229	3041250	1.95163e+06
2	A10	AK097723-3	AK097723	2.43451e+06	1.37765e+06
2	A11	AK094229-2	AK094229	1.82218e+06	3.05956e+06
2	A12	AK097723-1	AK097723	2.10737e+06	1.79854e+06
2	A13	AK094291-3	AK094291	2901222	232487
2	A14	AK097723-2	AK097723	3.37127e+06	2.35134e+06
2	A15	AK094291-1	AK094291	4.11387e+06	4.4739e+06
2	A16	AK097967-3	AK097967	1.75271e+06	3.45168e+06
2	A17	AK094291-2	AK094291	4487968	2.31511e+06
2	A18	AK097967-1	AK097967	4.3135e+06	2.20481e+06
2	A19	AK094428-3	AK094428	3.11123e+06	969298
2	A20	AK097967-2	AK097967	2.02833e+06	1.99009e+06
2	A21	AK094428-1	AK094428	2.0019e+06	506138
2	A22	AK098015-3	AK098015	1.40359e+06	1.77331e+06
2	A23	AK094428-2	AK094428	1.22949e+06	711805
2	A24	AK098015-1	AK098015	2.77806e+06	1.93169e+06
2	B01	AK124468-2	AK124468	1464958	1.52318e+06
2	B02	AK128696-1	AK128696	2.023e+06	2.0891e+06
2	B03	AK124787-3	AK124787	2.27804e+06	2.01366e+06
2	B04	AK128696-2	AK128696	1.56222e+06	1.07825e+06
2	B05	AK124787-1	AK124787	1.20105e+06	1612611
2	B06	AK128740-3	AK128740	2310845	1.09001e+06
2	B07	AK124787-2	AK124787	2.8911e+06	1.58542e+06
2	B08	AK128740-1	AK128740	2225803	1.54208e+06
2	B09	AK124792-3	AK124792	1963569	1.67711e+06
2	B10	AK128740-2	AK128740	2.97055e+06	1.68151e+06
2	B11	AK124792-1	AK124792	2.00278e+06	3.11887e+06
2	B12	AK128860-3	AK128860	2.88835e+06	529942
2	B13	AK124792-2	AK124792	2.75451e+06	2250055
2	B14	AK128860-1	AK128860	3.11486e+06	1.79953e+06
2	B15	AK124871-3	AK124871	2.78659e+06	1.60227e+06
2	B16	AK128860-2	AK128860	2.14792e+06	1.13393e+06
2	B17	AK124871-1	AK124871	973262	2.85764e+06
2	B18	AK129584-3	AK129584	2.41533e+06	1066190
2	B19	AK124871-2	AK124871	1.85058e+06	1.44517e+06
2	B20	AK129584-1	AK129584	2.8955e+06	1.79447e+06
2	B21	AK124913-3	AK124913	3.1266e+06	1.90533e+06
2	B22	AK129584-2	AK129584	1.72395e+06	2.08562e+06
2	B23	AK124913-1	AK124913	2.77204e+06	2.25644e+06
2	B24	AK129624-3	AK129624	2.45165e+06	983346
2	C01	AK095229-3	AK095229	2.51441e+06	2633916
2	C02	AK098015-2	AK098015	1.81871e+06	1.08989e+06
2	C03	AK095229-1	AK095229	1.81802e+06	456096
2	C04	AK098124-3	AK098124	2.88364e+06	1685887
2	C05	AK095229-2	AK095229	2.5987e+06	1288540
2	C06	AK098124-1	AK098124	2.98083e+06	1.86251e+06
2	C07	AK095568-3	AK095568	3305100	1.38994e+06
2	C08	AK098124-2	AK098124	1.40997e+06	470263
2	C09	AK095568-1	AK095568	3184538	937906
2	C10	AK098201-3	AK098201	2.86587e+06	893691
2	C11	AK095568-2	AK095568	3.09743e+06	1.64717e+06
2	C12	AK098311-1	AK098311	1871964	995703
2	C13	AK095748-3	AK095748	2491414	1150617
2	C14	AK098324-1	AK098324	3.38278e+06	1046184
2	C15	AK095748-1	AK095748	2.55336e+06	2.05159e+06
2	C16	AK098324-1	AK098324	2.38939e+06	2.81216e+06
2	C17	AK095748-2	AK095748	1.61736e+06	1.9859e+06
2	C18	AK098324-2	AK098324	2.52009e+06	1.4566e+06
2	C19	AK095756-3	AK095756	1.90406e+06	921280
2	C20	AK098335-3	AK098335	2.75767e+06	1.02364e+06
2	C21	AK095756-1	AK095756	2.14055e+06	2.53202e+06
2	C22	AK098335-1	AK098335	1.51872e+06	2.34429e+06
2	C23	AK095756-2	AK095756	848524	768270
2	C24	AK098335-2	AK098335	2.58769e+06	1.92379e+06
2	D01	AK124913-2	AK124913	1.34392e+06	857196
2	D02	AK129624-1	AK129624	1.59055e+06	1.57193e+06
2	D03	AK124977-3	AK124977	1.98559e+06	1.12756e+06
2	D04	AK129624-2	AK129624	823890	785135
2	D05	AK124977-1	AK124977	1.35478e+06	1.21061e+06
2	D06	AK129723-3	AK129723	1.74291e+06	1.54212e+06
2	D07	AK124977-2	AK124977	1.87859e+06	1.64212e+06
2	D08	AK129723-1	AK129723	1.85067e+06	2174428
2	D09	AK125158-3	AK125158	2.09222e+06	857561
2	D10	AK129723-2	AK129723	1.48182e+06	618891
2	D11	AK125158-1	AK125158	2.04522e+06	2.18833e+06
2	D12	AK129888-3	AK129888	2632956	951886
2	D13	AK125158-2	AK125158	1.738e+06	2.61934e+06
2	D14	AK129969-1	AK129969	1.36937e+06	1.18346e+06
2	D15	AK125173-3	AK125173	2.3894e+06	615058
2	D16	AK130583-1	AK130583	1.43579e+06	440717
2	D17	AK125173-1	AK125173	2.29348e+06	1949847
2	D18	AK130583-1	AK130583	1.20501e+06	2.32757e+06
2	D19	AK125173-2	AK125173	1.52593e+06	1.09082e+06
2	D20	AK130583-2	AK130583	1.92417e+06	691264
2	D21	AK125392-3	AK125392	1.66235e+06	1.28299e+06
2	D22	AK130624-3	AK130624	3.0623e+06	2607417
2	D23	AK125392-1	AK125392	1873379	1.38488e+06
2	D24	AK172808-1	AK172808	2.42278e+06	731458
2	E01	AK095813-3	AK095813	2373458	1.43794e+06
2	E02	AK098497-3	AK098497	1.94007e+06	222993
2	E03	AK095813-1	AK095813	2078013	1.60889e+06
2	E04	AK098497-1	AK098497	1.60267e+06	891577
2	E05	AK095813-2	AK095813	1.68538e+06	1.41227e+06
2	E06	AK098497-2	AK098497	2.01455e+06	1.28899e+06
2	E07	AK095815-3	AK095815	1.39867e+06	1.3703e+06
2	E08	AK098628-3	AK098628	1.95878e+06	817359
2	E09	AK095815-1	AK095815	1889180	918120
2	E10	AK098628-1	AK098628	1.94359e+06	1211725
2	E11	AK095815-2	AK095815	1650622	1.70702e+06
2	E12	AK098628-2	AK098628	1.42767e+06	849994
2	E13	AK095876-3	AK095876	2254905	1.23159e+06
2	E14	AK098638-3	AK098638	2260194	1.85254e+06
2	E15	AK095876-1	AK095876	1.85444e+06	1.82175e+06
2	E16	AK098638-1	AK098638	1.77891e+06	1.72767e+06
2	E17	AK095876-2	AK095876	1863833	909333
2	E18	AK098638-2	AK098638	1.44311e+06	1.61309e+06
2	E19	AK095951-3	AK095951	2.30606e+06	1.15566e+06
2	E20	AK098655-3	AK098655	1.53095e+06	1.56758e+06
2	E21	AK095951-1	AK095951	760137	1.38225e+06
2	E22	AK122738-1	AK122738	1.44762e+06	1.07811e+06
2	E23	AK095951-2	AK095951	1.46656e+06	352107
2	E24	AK122738-1	AK122738	1.55492e+06	1.12892e+06
2	F01	AK125392-2	AK125392	605985	707372
2	F02	AK172808-1	AK172808	1143985	920100
2	F03	AK125532-3	AK125532	1130304	915608
2	F04	AK172808-2	AK172808	924599	664929
2	F05	AK125532-1	AK125532	1.16634e+06	642767
2	F06	AL040447-3	AL040447	1.03053e+06	715431
2	F07	AK125532-2	AK125532	1.33898e+06	1171616
2	F08	AL040447-1	AL040447	1.92528e+06	2.15118e+06
2	F09	AK125571-3	AK125571	1.73416e+06	1.45281e+06
2	F10	AL040447-2	AL040447	2.54999e+06	1.79714e+06
2	F11	AK125571-1	AK125571	1.74007e+06	983174
2	F12	AL040483-3	AL040483	1.41847e+06	1.5528e+06
2	F13	AK125571-2	AK125571	2.29612e+06	1.71579e+06
2	F14	AL044613-1	AL044613	1.78856e+06	1.02363e+06
2	F15	AK125601-3	AK125601	1.28231e+06	1.64466e+06
2	F16	AL049447-1	AL049447	603058	2750120
2	F17	AK125601-1	AK125601	1.37752e+06	1.23151e+06
2	F18	AL049447-1	AL049447	1.36488e+06	989515
2	F19	AK125601-2	AK125601	1702566	663073
2	F20	AL049447-2	AL049447	1.43498e+06	1.10588e+06
2	F21	AK125857-3	AK125857	1.69235e+06	229948
2	F22	AL049932-3	AL049932	1.75411e+06	1.7899e+06
2	F23	AK125857-1	AK125857	1.58111e+06	500719
2	F24	AL050082-1	AL050082	2303431	1.84867e+06
2	G01	AK096066-3	AK096066	2.42621e+06	896047
2	G02	AK122738-2	AK122738	1.76282e+06	1.13778e+06
2	G03	AK096066-1	AK096066	2.15845e+06	1894822
2	G04	AK122779-3	AK122779	1.76099e+06	1.70866e+06
2	G05	AK096066-2	AK096066	2623548	826354
2	G06	AK122779-1	AK122779	2.86256e+06	591662
2	G07	AK096268-3	AK096268	3.74813e+06	865879
2	G08	AK122779-2	AK122779	2572461	1.71765e+06
2	G09	AK096268-1	AK096268	2000360	1380762
2	G10	AK122785-3	AK122785	1.44347e+06	999760
2	G11	AK096268-2	AK096268	2.17205e+06	1.66807e+06
2	G12	AK122785-1	AK122785	2.16551e+06	1.01836e+06
2	G13	AK096309-3	AK096309	1.89487e+06	1.48696e+06
2	G14	AK122785-2	AK122785	2.3875e+06	1.86454e+06
2	G15	AK096309-1	AK096309	2.12081e+06	1.29363e+06
2	G16	AK122947-3	AK122947	2.05088e+06	711873
2	G17	AK096309-2	AK096309	2.58617e+06	1.56387e+06
2	G18	AK122947-1	AK122947	1.06736e+06	1239118
2	G19	AK096334-3	AK096334	2247591	948388
2	G20	AK122947-2	AK122947	2503948	1533342
2	G21	AK096334-1	AK096334	2.31406e+06	846938
2	G22	AK122959-3	AK122959	2.2274e+06	1.52847e+06
2	G23	AK096334-2	AK096334	1511042	458109
2	G24	AK123139-1	AK123139	1.96882e+06	1.07229e+06
2	H01	AK125857-2	AK125857	949816	799180
2	H02	AL050082-1	AL050082	1.06309e+06	998100
2	H03	AK125876-3	AK125876	1.4407e+06	1.08956e+06
2	H04	AL050082-2	AL050082	1.4556e+06	1.46763e+06
2	H05	AK125876-1	AK125876	1.19569e+06	931854
2	H06	AL050131-3	AL050131	1.42522e+06	1.70423e+06
2	H07	AK125876-2	AK125876	1.67791e+06	1.08678e+06
2	H08	AL050172-1	AL050172	1606054	823089
2	H09	AK125920-3	AK125920	2.13528e+06	1.07096e+06
2	H10	AL050172-1	AL050172	1.65927e+06	1160982
2	H11	AK125920-1	AK125920	1.79917e+06	1.63719e+06
2	H12	AL050172-2	AL050172	1.84596e+06	1.19777e+06
2	H13	AK125920-2	AK125920	1564668	1.35727e+06
2	H14	AL050203-3	AL050203	1.3196e+06	1.13071e+06
2	H15	AK125930-3	AK125930	1590026	664354
2	H16	AL050203-1	AL050203	1.69149e+06	1.62193e+06
2	H17	AK125930-1	AK125930	1.4846e+06	1.11508e+06
2	H18	AL050203-2	AL050203	1.46542e+06	1.23638e+06
2	H19	AK125930-2	AK125930	1.25042e+06	1.19231e+06
2	H20	AL050376-3	AL050376	1.38967e+06	265353
2	H21	AK126088-3	AK126088	1079986	975497
2	H22	AL050376-1	AL050376	1.97729e+06	631932
2	H23	AK126088-1	AK126088	2029154	1.30906e+06
2	H24	AL050376-2	AL050376	1.89441e+06	1.6932e+06
2	I01	AK096470-3	AK096470	2.1053e+06	1.08182e+06
2	I02	AK123139-1	AK123139	1.97289e+06	1.56715e+06
2	I03	AK096470-1	AK096470	2.06387e+06	1.36113e+06
2	I04	AK123139-2	AK123139	1.68167e+06	1.51499e+06
2	I05	AK096470-2	AK096470	2954491	1.66147e+06
2	I06	AK123142-3	AK123142	1.75095e+06	1960228
2	I07	AK096625-3	AK096625	1.65063e+06	1.09467e+06
2	I08	AK123142-1	AK123142	1.90875e+06	1.44668e+06
2	I09	AK096625-1	AK096625	2.03147e+06	1.3194e+06
2	I10	AK123142-2	AK123142	1.73537e+06	462382
2	I11	AK096625-2	AK096625	1609079	1.23643e+06
2	I12	AK123181-3	AK123181	1.75197e+06	1.25341e+06
2	I13	AK096649-3	AK096649	2.50098e+06	608098
2	I14	AK123181-1	AK123181	1320718	492166
2	I15	AK096649-1	AK096649	1.67807e+06	1467327
2	I16	AK123181-2	AK123181	2.27916e+06	1309186
2	I17	AK096649-2	AK096649	1.61345e+06	1.74592e+06
2	I18	AK123201-3	AK123201	65057.2	1.89335e+06
2	I19	AK096738-3	AK096738	2179345	1.53568e+06
2	I20	AK123292-1	AK123292	1.6848e+06	1.41903e+06
2	I21	AK096738-1	AK096738	2.0898e+06	839412
2	I22	AK123292-1	AK123292	2.16141e+06	1.86009e+06
2	I23	AK096738-2	AK096738	682541	1.06439e+06
2	I24	AK123292-2	AK123292	1500235	945489
2	J01	AK126088-2	AK126088	1.788e+06	400390
2	J02	AL080152-3	AL080152	1.69441e+06	1.80811e+06
2	J03	AK126369-3	AK126369	1.71277e+06	778554
2	J04	AL080152-1	AL080152	1.42413e+06	1.33106e+06
2	J05	AK126369-1	AK126369	1.23688e+06	1.17357e+06
2	J06	AL080152-2	AL080152	1.21713e+06	1.15747e+06
2	J07	AK126369-2	AK126369	2.60423e+06	1292052
2	J08	AL110193-3	AL110193	1.51379e+06	1.00893e+06
2	J09	AK126410-3	AK126410	1599888	700461
2	J10	AL110193-1	AL110193	2.08074e+06	1.06861e+06
2	J11	AK126410-1	AK126410	2230810	2.32768e+06
2	J12	AL110193-2	AL110193	2628997	2.01547e+06
2	J13	AK126410-2	AK126410	1.6068e+06	1.87725e+06
2	J14	AL117425-3	AL117425	1.62619e+06	1.7478e+06
2	J15	AK126784-3	AK126784	1.40209e+06	1.33518e+06
2	J16	AL117425-1	AL117425	1.97117e+06	966186
2	J17	AK126784-1	AK126784	1.82981e+06	1.25226e+06
2	J18	AL117425-2	AL117425	1.62002e+06	714386
2	J19	AK126784-2	AK126784	1.35215e+06	993224
2	J20	AL117548-3	AL117548	1613739	977262
2	J21	AK126820-3	AK126820	2.01887e+06	1388300
2	J22	AL117548-1	AL117548	1.97192e+06	1.07581e+06
2	J23	AK126820-1	AK126820	2761889	615152
2	J24	AL117548-2	AL117548	1.5481e+06	1.31799e+06
2	K01	AK096757-3	AK096757	2.17077e+06	1.66162e+06
2	K02	AK123315-3	AK123315	2.41228e+06	1107896
2	K03	AK096757-1	AK096757	2.85076e+06	515038
2	K04	AK123315-1	AK123315	1.87725e+06	1.20368e+06
2	K05	AK096757-2	AK096757	1.80083e+06	820648
2	K06	AK123315-2	AK123315	2079510	477555
2	K07	AK096807-3	AK096807	2.53166e+06	1.92872e+06
2	K08	AK123360-3	AK123360	1.87252e+06	849304
2	K09	AK096807-1	AK096807	1.9925e+06	1.52307e+06
2	K10	AK123360-1	AK123360	1.50743e+06	1.26822e+06
2	K11	AK096807-2	AK096807	1.87179e+06	1157160
2	K12	AK123360-2	AK123360	1.83524e+06	2.14546e+06
2	K13	AK096880-3	AK096880	1688054	411620
2	K14	AK123570-3	AK123570	2324958	1.03157e+06
2	K15	AK096880-1	AK096880	2333520	1.89014e+06
2	K16	AK123570-1	AK123570	2.12127e+06	1.14526e+06
2	K17	AK096880-2	AK096880	1.89182e+06	1.59572e+06
2	K18	AK123570-2	AK123570	1.98791e+06	1.88578e+06
2	K19	AK096921-3	AK096921	2.09649e+06	1552580
2	K20	AK123707-3	AK123707	1550696	1.39819e+06
2	K21	AK096921-1	AK096921	2.30406e+06	2144518
2	K22	AK123707-1	AK123707	2.19198e+06	1656756
2	K23	AK096921-2	AK096921	1.55415e+06	715182
2	K24	AK123707-2	AK123707	2.48847e+06	1.59648e+06
2	L01	AK126820-2	AK126820	1.79821e+06	1.4694e+06
2	L02	AL133017-3	AL133017	1.94668e+06	984498
2	L03	AK127256-3	AK127256	1.88916e+06	1.76623e+06
2	L04	AL133017-1	AL133017	1.93651e+06	813934
2	L05	AK127256-1	AK127256	1.31238e+06	555610
2	L06	AL133017-2	AL133017	1807938	472659
2	L07	AK127256-2	AK127256	1.64996e+06	1.23773e+06
2	L08	AL133022-3	AL133022	2.89189e+06	1.08901e+06
2	L09	AK127259-3	AK127259	2517200	1.10376e+06
2	L10	AL133022-1	AL133022	2.23125e+06	1519376
2	L11	AK127259-1	AK127259	1.82827e+06	1196806
2	L12	AL133022-2	AL133022	1530592	1.2328e+06
2	L13	AK127259-2	AK127259	1.9485e+06	1.45662e+06
2	L14	AL133031-3	AL133031	1.48658e+06	1.48518e+06
2	L15	AK127319-3	AK127319	2.20158e+06	1.61261e+06
2	L16	AL133031-1	AL133031	2.52333e+06	2.25655e+06
2	L17	AK127319-1	AK127319	1.48522e+06	470964
2	L18	AL133031-2	AL133031	1.81252e+06	957743
2	L19	AK127319-2	AK127319	1.38814e+06	1050726
2	L20	AL133091-3	AL133091	1.85372e+06	1.31128e+06
2	L21	AK127616-3	AK127616	1.70116e+06	2.155e+06
2	L22	AL133091-1	AL133091	2.54719e+06	1.48034e+06
2	L23	AK127616-1	AK127616	1.94834e+06	1161612
2	L24	AL133091-2	AL133091	2863257	316005
2	M01	AK097453-3	AK097453	1119704	1.92064e+06
2	M02	AK123759-3	AK123759	2120435	1.77027e+06
2	M03	AK097453-1	AK097453	1994762	1.36611e+06
2	M04	AK123759-1	AK123759	1.71579e+06	989513
2	M05	AK097453-2	AK097453	1.96956e+06	1.44644e+06
2	M06	AK123759-2	AK123759	2.0247e+06	1.7239e+06
2	M07	AK097455-3	AK097455	2.23822e+06	1.32985e+06
2	M08	AK123825-3	AK123825	1.74928e+06	625234
2	M09	AK097455-1	AK097455	1.78279e+06	1.32373e+06
2	M10	AK123825-1	AK123825	1.99679e+06	790343
2	M11	AK097455-2	AK097455	1.65615e+06	1.07115e+06
2	M12	AK123825-2	AK123825	1.55461e+06	1197470
2	M13	AK097483-3	AK097483	1.60917e+06	1155449
2	M14	AK123921-3	AK123921	2.25784e+06	1.39349e+06
2	M15	AK097483-1	AK097483	2215924	1225393
2	M16	AK123921-1	AK123921	1.60527e+06	1114485
2	M17	AK097483-2	AK097483	2.38758e+06	1.08843e+06
2	M18	empty	empty	NA	NA
2	M19	AK097550-3	AK097550	2.13365e+06	1.0384e+06
2	M20	AK124129-3	AK124129	2.17158e+06	1.36522e+06
2	M21	GL3	GL3	194990	61810.7
2	M22	GL3	GL3	127577	76807.7
2	M23	GL3	GL3	127398	47557.2
2	M24	GL3	GL3	136353	62932.8
2	N01	AK127616-2	AK127616	1.02537e+06	1.0463e+06
2	N02	AL137656-3	AL137656	1.19047e+06	1.26794e+06
2	N03	AK127752-3	AK127752	1.78537e+06	1362126
2	N04	AL137656-1	AL137656	1.68032e+06	591433
2	N05	AK127752-1	AK127752	1.83605e+06	1.14097e+06
2	N06	AL137656-2	AL137656	1.41477e+06	837768
2	N07	AK127752-2	AK127752	1.94106e+06	1.29337e+06
2	N08	AL359625-3	AL359625	1436592	1.16605e+06
2	N09	AK127967-3	AK127967	2.27429e+06	1.13096e+06
2	N10	AL390148-1	AL390148	2.96173e+06	1.19816e+06
2	N11	AK127967-1	AK127967	1.69039e+06	1.50539e+06
2	N12	AL390148-1	AL390148	1.50046e+06	1.55672e+06
2	N13	AK127967-2	AK127967	1.32715e+06	1.17665e+06
2	N14	AL390148-2	AL390148	1.48976e+06	850786
2	N15	AK128017-3	AK128017	1.39724e+06	1.06201e+06
2	N16	AL525401-3	AL525401	1.7511e+06	926141
2	N17	AK128017-1	AK128017	1.32322e+06	455615
2	N18	AL525401-1	AL525401	1.8868e+06	1.19536e+06
2	N19	AK128017-2	AK128017	1.4363e+06	459284
2	N20	AL525401-2	AL525401	1.8205e+06	436246
2	N21	GL3	GL3	104297	105342
2	N22	GL3	GL3	118658	66394.8
2	N23	GL3	GL3	144890	74288.1
2	N24	GL3	GL3	117248	81189.4
2	O01	AK097550-1	AK097550	1.53767e+06	1.34167e+06
2	O02	AK124129-1	AK124129	1.88505e+06	1.4543e+06
2	O03	AK097550-2	AK097550	3033923	2.33138e+06
2	O04	AK124129-2	AK124129	1.09122e+06	1607867
2	O05	AK097621-3	AK097621	2.34837e+06	1938307
2	O06	AK124240-3	AK124240	1205077	1.84952e+06
2	O07	AK097621-1	AK097621	1.48454e+06	479022
2	O08	AK124240-1	AK124240	2.69793e+06	2.08277e+06
2	O09	AK097621-2	AK097621	1.95069e+06	1.15462e+06
2	O10	AK124240-2	AK124240	1839870	1.06774e+06
2	O11	AK097691-3	AK097691	2.28348e+06	1.83773e+06
2	O12	AK124449-3	AK124449	1.94304e+06	1.50637e+06
2	O13	AK097691-1	AK097691	2.11873e+06	713542
2	O14	AK124449-1	AK124449	2.42373e+06	1.66744e+06
2	O15	AK097691-2	AK097691	1.80699e+06	1265021
2	O16	AK124449-2	AK124449	2722970	2.31992e+06
2	O17	AK097705-3	AK097705	2.59827e+06	1755210
2	O18	AK124468-3	AK124468	2.4177e+06	1.20627e+06
2	O19	AK097705-1	AK097705	2350680	1.13019e+06
2	O20	AK124468-1	AK124468	2400442	754499
2	O21	GL3	GL3	131508	21454.3
2	O22	GL3	GL3	154927	64526.1
2	O23	mock	mock	2.44986e+06	1.46739e+06
2	O24	mock	mock	1.52843e+06	1336529
2	P01	AK128337-3	AK128337	1.64776e+06	246766
2	P02	AL536768-3	AL536768	1.08989e+06	729608
2	P03	AK128337-1	AK128337	1.27064e+06	1.58751e+06
2	P04	AL583533-1	AL583533	1.50368e+06	1.44842e+06
2	P05	AK128337-2	AK128337	1.97153e+06	2228985
2	P06	AL583533-1	AL583533	2.3517e+06	1.68325e+06
2	P07	AK128435-3	AK128435	2.38647e+06	1.09794e+06
2	P08	AL583533-2	AL583533	2.47577e+06	1.61145e+06
2	P09	AK128435-1	AK128435	2056094	1.17495e+06
2	P10	AL597577-3	AL597577	1.92231e+06	1080114
2	P11	AK128435-2	AK128435	2423663	1.99364e+06
2	P12	AL597577-1	AL597577	2.28989e+06	1.17057e+06
2	P13	AK128611-3	AK128611	2.04622e+06	1.05106e+06
2	P14	AL597577-2	AL597577	1.78021e+06	1.22485e+06
2	P15	AK128611-1	AK128611	2.01761e+06	1.49751e+06
2	P16	AL691606-3	AL691606	1.9076e+06	784236
2	P17	AK128611-2	AK128611	1990367	663599
2	P18	AL703906-1	AL703906	2.69763e+06	1.35951e+06
2	P19	AK128696-3	AK128696	1.58723e+06	1.10778e+06
2	P20	AL705375-1	AL705375	2.0566e+06	1.78597e+06
2	P21	GL3	GL3	138491	87428.3
2	P22	GL3	GL3	139116	21278.1
2	P23	mock	mock	1.51209e+06	1.51599e+06
2	P24	mock	mock	983851	1.24998e+06
3	A01	AL713723-1	AL713723	2.49215e+06	2908771
3	A02	AX810704-2	AX810704	351492	3.41143e+06
3	A03	AL713723-1	AL713723	2171849	2.53384e+06
3	A04	AX810704-1	AX810704	2778300	854279
3	A05	AL713723-2	AL713723	1.88223e+06	2.04543e+06
3	A06	AX810704-2	AX810704	2.42464e+06	1.59638e+06
3	A07	AL713774-3	AL713774	1.69527e+06	2.39568e+06
3	A08	BC002482-3	BC002482	1.63722e+06	2.42242e+06
3	A09	AL713774-1	AL713774	1.51634e+06	888620
3	A10	BC002482-1	BC002482	1.93169e+06	1.25564e+06
3	A11	AL713774-2	AL713774	1.0995e+06	1.66832e+06
3	A12	BC002482-2	BC002482	2.7414e+06	2.05504e+06
3	A13	AL831948-3	AL831948	2549314	2.61743e+06
3	A14	BC002572-3	BC002572	1.88289e+06	1.61896e+06
3	A15	AL831948-1	AL831948	4.33763e+06	3686111
3	A16	BC002572-1	BC002572	2.17429e+06	1.15254e+06
3	A17	AL831948-2	AL831948	1.43666e+06	2.0336e+06
3	A18	BC002572-2	BC002572	953720	3.7063e+06
3	A19	AL832138-3	AL832138	2282240	2.47533e+06
3	A20	BC004198-3	BC004198	2.63425e+06	2313643
3	A21	AL832142-1	AL832142	1.89213e+06	2.58753e+06
3	A22	BC004198-1	BC004198	1.74581e+06	2.01251e+06
3	A23	AL832142-1	AL832142	1.31848e+06	974070
3	A24	BC004474-2	BC004474	2.13992e+06	3.90902e+06
3	B01	BC031867-2	BC031867	1.31488e+06	645027
3	B02	BC041581-2	BC041581	2.49166e+06	1.90065e+06
3	B03	BC032497-3	BC032497	2.84653e+06	903464
3	B04	BC041597-3	BC041597	3.85014e+06	2576887
3	B05	BC032497-1	BC032497	1.77606e+06	1.82852e+06
3	B06	BC041597-1	BC041597	2.09313e+06	1.70883e+06
3	B07	BC032497-2	BC032497	966680	786146
3	B08	BC041597-2	BC041597	1.84353e+06	1.72274e+06
3	B09	BC033324-3	BC033324	1.69079e+06	765589
3	B10	BC041872-3	BC041872	1.61871e+06	1.59677e+06
3	B11	BC033324-1	BC033324	2.56483e+06	2.7414e+06
3	B12	BC041872-1	BC041872	2.13957e+06	1.94743e+06
3	B13	BC033324-2	BC033324	2.61893e+06	1.11079e+06
3	B14	BC041872-2	BC041872	1.3383e+06	3.16654e+06
3	B15	BC033833-3	BC033833	2.01209e+06	1.94522e+06
3	B16	BC042033-3	BC042033	3.96799e+06	3.36623e+06
3	B17	BC033833-1	BC033833	3191855	2.88709e+06
3	B18	BC042096-1	BC042096	2489576	1.09268e+06
3	B19	BC033833-2	BC033833	3.24322e+06	214426
3	B20	BC042096-1	BC042096	1.59831e+06	687462
3	B21	BC034000-3	BC034000	2.17392e+06	2.46581e+06
3	B22	BC042096-2	BC042096	2.82213e+06	2.63602e+06
3	B23	BC034000-1	BC034000	919724	1.95883e+06
3	B24	BC042182-3	BC042182	937834	2247694
3	C01	AL832142-2	AL832142	2.35204e+06	2.01928e+06
3	C02	BC004474-1	BC004474	2.78674e+06	2523576
3	C03	AL832745-3	AL832745	1678717	1.88008e+06
3	C04	BC004474-2	BC004474	1.49141e+06	1.05328e+06
3	C05	AL832745-1	AL832745	1.52121e+06	2.81551e+06
3	C06	BC007288-3	BC007288	2254265	1380192
3	C07	AL832745-2	AL832745	2.12142e+06	2209837
3	C08	BC007288-1	BC007288	2.48908e+06	1.27262e+06
3	C09	AL832922-3	AL832922	3.08065e+06	1.58027e+06
3	C10	BC007288-2	BC007288	2213433	1.62761e+06
3	C11	AL832922-1	AL832922	2.54402e+06	3107633
3	C12	BC008711-3	BC008711	1.90228e+06	1068008
3	C13	AL832922-2	AL832922	1.47169e+06	1.90379e+06
3	C14	BC008711-1	BC008711	2.17242e+06	2.63576e+06
3	C15	AL833171-3	AL833171	3068154	3.37718e+06
3	C16	BC009560-2	BC009560	3.29132e+06	2.15221e+06
3	C17	AL833171-1	AL833171	1.88927e+06	2.33445e+06
3	C18	BC010081-1	BC010081	1.98351e+06	2.42794e+06
3	C19	AL833171-2	AL833171	2.09746e+06	2187207
3	C20	BC010081-1	BC010081	2.85061e+06	3.71841e+06
3	C21	AL833172-3	AL833172	2.29551e+06	1.73293e+06
3	C22	BC010081-2	BC010081	1.74903e+06	2.67348e+06
3	C23	AL833172-1	AL833172	2648853	1.82385e+06
3	C24	BC013021-3	BC013021	2.28222e+06	1.77971e+06
3	D01	BC034000-2	BC034000	930583	883123
3	D02	BC042182-1	BC042182	2.32336e+06	1.01556e+06
3	D03	BC034295-3	BC034295	2.03842e+06	1.54918e+06
3	D04	BC042182-2	BC042182	775897	1.59055e+06
3	D05	BC034295-1	BC034295	1558413	903035
3	D06	BC042390-3	BC042390	1.09245e+06	685126
3	D07	BC034295-2	BC034295	2.26978e+06	1.55563e+06
3	D08	BC042390-1	BC042390	1.73118e+06	1.14989e+06
3	D09	BC034380-3	BC034380	2388986	2669408
3	D10	BC042390-2	BC042390	3046432	1.24253e+06
3	D11	BC034669-1	BC034669	3.36356e+06	1.36e+06
3	D12	BC042414-3	BC042414	2414595	1462985
3	D13	BC034792-1	BC034792	1.02387e+06	1.97832e+06
3	D14	BC042414-1	BC042414	3338028	3152598
3	D15	BC034792-1	BC034792	2.23e+06	1401403
3	D16	BC042414-2	BC042414	1666700	1411369
3	D17	BC034792-2	BC034792	1663326	1.92535e+06
3	D18	BC042826-3	BC042826	1092884	1.50081e+06
3	D19	BC034928-3	BC034928	2.01772e+06	1.75601e+06
3	D20	BC043236-1	BC043236	2.34279e+06	1.79242e+06
3	D21	BC034928-1	BC034928	2275775	1.59149e+06
3	D22	BC043236-1	BC043236	1.95796e+06	2355095
3	D23	BC034928-2	BC034928	2.35663e+06	2.34145e+06
3	D24	BC043236-2	BC043236	1.5896e+06	2439491
3	E01	AL833172-2	AL833172	2.00686e+06	1.68218e+06
3	E02	BC013021-1	BC013021	421969	1.78318e+06
3	E03	AL833189-3	AL833189	2.09528e+06	1.49109e+06
3	E04	BC019904-2	BC019904	2.27797e+06	1.66849e+06
3	E05	AL833189-1	AL833189	2621346	989588
3	E06	BC019904-1	BC019904	2623761	1.60322e+06
3	E07	AL833189-2	AL833189	1844231	1.57471e+06
3	E08	BC019904-2	BC019904	1.74191e+06	1.09485e+06
3	E09	AL833241-3	AL833241	2.1398e+06	1.30538e+06
3	E10	BC021162-3	BC021162	2.28756e+06	1.82426e+06
3	E11	AL833241-1	AL833241	2.02217e+06	2.0307e+06
3	E12	BC021162-1	BC021162	2.63855e+06	1.51466e+06
3	E13	AL833241-2	AL833241	1.92835e+06	1465417
3	E14	BC021162-2	BC021162	2.81472e+06	1.969e+06
3	E15	AL833295-3	AL833295	2168972	1.10689e+06
3	E16	BC021231-3	BC021231	2.01911e+06	1.85916e+06
3	E17	AL833295-1	AL833295	1.46258e+06	1384107
3	E18	BC021231-1	BC021231	2.5649e+06	2.07594e+06
3	E19	AL833295-2	AL833295	1.93243e+06	1.75478e+06
3	E20	BC021231-2	BC021231	2.05805e+06	1.77511e+06
3	E21	AL833326-3	AL833326	2.11613e+06	1.6367e+06
3	E22	BC021999-3	BC021999	2.21506e+06	1685292
3	E23	AL833326-1	AL833326	2.39537e+06	992981
3	E24	BC021999-1	BC021999	1.8621e+06	1.34476e+06
3	F01	BC034962-3	BC034962	443854	384932
3	F02	BC043441-3	BC043441	1.30414e+06	1.14901e+06
3	F03	BC034962-1	BC034962	1.67152e+06	1.38075e+06
3	F04	BC043441-1	BC043441	1.42129e+06	1.6625e+06
3	F05	BC034962-2	BC034962	1.65043e+06	841725
3	F06	BC043441-2	BC043441	1.71363e+06	1.34515e+06
3	F07	BC035693-3	BC035693	1.6412e+06	1.38686e+06
3	F08	BC043645-3	BC043645	1.58018e+06	1.78105e+06
3	F09	BC035693-1	BC035693	2100265	1.35539e+06
3	F10	BC043645-1	BC043645	2.50133e+06	1.5865e+06
3	F11	BC035693-2	BC035693	3.13992e+06	2.34888e+06
3	F12	BC043645-2	BC043645	2.59215e+06	1.57779e+06
3	F13	BC035759-3	BC035759	2.72662e+06	1404500
3	F14	BC044232-3	BC044232	1.75086e+06	843452
3	F15	BC035759-1	BC035759	2.10639e+06	1.07602e+06
3	F16	BC044232-1	BC044232	3.33103e+06	2.13693e+06
3	F17	BC035759-2	BC035759	2.08914e+06	2.00108e+06
3	F18	BC044232-2	BC044232	1.16206e+06	1.12968e+06
3	F19	BC035936-3	BC035936	1.65837e+06	808177
3	F20	BC044307-3	BC044307	2.2888e+06	1.40854e+06
3	F21	BC035936-1	BC035936	2.08395e+06	1550087
3	F22	BC044307-1	BC044307	1.75927e+06	1.36989e+06
3	F23	BC035936-2	BC035936	2.80097e+06	1.73999e+06
3	F24	BC044307-2	BC044307	1.80034e+06	865415
3	G01	AL833326-2	AL833326	1.61039e+06	1.47063e+06
3	G02	BC021999-2	BC021999	995552	1.55753e+06
3	G03	AL833496-3	AL833496	1676612	1.81747e+06
3	G04	BC022420-3	BC022420	1.52469e+06	1.43799e+06
3	G05	AL833496-1	AL833496	2.13678e+06	2289327
3	G06	BC022420-1	BC022420	2375080	2.47516e+06
3	G07	AL833496-2	AL833496	1.76232e+06	1.89525e+06
3	G08	BC022420-2	BC022420	2.69495e+06	1.79092e+06
3	G09	AL833636-3	AL833636	2.42381e+06	1.76626e+06
3	G10	BC022457-3	BC022457	2168277	2102746
3	G11	AL833636-1	AL833636	1.93336e+06	1.9607e+06
3	G12	BC022457-1	BC022457	1.67866e+06	1.79759e+06
3	G13	AL833636-2	AL833636	1455762	2.04223e+06
3	G14	BC022457-2	BC022457	1.87326e+06	1.76705e+06
3	G15	AL834347-3	AL834347	2.18258e+06	1.02057e+06
3	G16	BC023578-3	BC023578	3.05677e+06	855524
3	G17	AL834347-1	AL834347	1.87e+06	2.37787e+06
3	G18	BC023578-1	BC023578	2199350	2.47997e+06
3	G19	AL834347-2	AL834347	2403182	2.75443e+06
3	G20	BC023578-2	BC023578	1.73428e+06	1.55011e+06
3	G21	AU142677-3	AU142677	2.92063e+06	3.52691e+06
3	G22	BC024931-3	BC024931	1.2942e+06	1.54782e+06
3	G23	AU142677-1	AU142677	2.20141e+06	2.75734e+06
3	G24	BC024931-1	BC024931	2.88404e+06	2487614
3	H01	BC036482-3	BC036482	872297	706320
3	H02	BC045573-3	BC045573	1.07609e+06	894191
3	H03	BC036482-1	BC036482	1.40715e+06	1950327
3	H04	BC045573-1	BC045573	1.22134e+06	1.36717e+06
3	H05	BC036482-2	BC036482	1.31402e+06	1.72031e+06
3	H06	BC045573-2	BC045573	1.29435e+06	1.50398e+06
3	H07	BC036509-3	BC036509	838235	1.12113e+06
3	H08	BC045668-3	BC045668	1560050	2.09403e+06
3	H09	BC036509-1	BC036509	1.92849e+06	1921887
3	H10	BC045668-1	BC045668	2.02247e+06	2199702
3	H11	BC036509-2	BC036509	2.29898e+06	1618532
3	H12	BC045668-2	BC045668	2.25193e+06	2.56825e+06
3	H13	BC036879-3	BC036879	1.60499e+06	1.77704e+06
3	H14	BC046101-3	BC046101	1.64565e+06	1.05259e+06
3	H15	BC036879-1	BC036879	1.61018e+06	1.87915e+06
3	H16	BC046101-1	BC046101	1.61732e+06	1.12927e+06
3	H17	BC036879-2	BC036879	1291924	1.02454e+06
3	H18	BC046101-2	BC046101	2.36361e+06	2244106
3	H19	BC036892-3	BC036892	1.4841e+06	1.273e+06
3	H20	BC047224-3	BC047224	2.66725e+06	2.85496e+06
3	H21	BC036892-1	BC036892	1.4508e+06	1816531
3	H22	BC047224-1	BC047224	1.75131e+06	1.10834e+06
3	H23	BC036892-2	BC036892	3190014	2213970
3	H24	BC047224-2	BC047224	1.34847e+06	3443537
3	I01	AU142677-2	AU142677	1.40107e+06	1.54173e+06
3	I02	BC024931-2	BC024931	2.24258e+06	1.70033e+06
3	I03	AU143395-3	AU143395	3.02548e+06	2.16335e+06
3	I04	BC025287-3	BC025287	2.64442e+06	2.13973e+06
3	I05	AU143395-1	AU143395	1.59933e+06	1.93278e+06
3	I06	BC025779-1	BC025779	2.20944e+06	1.36864e+06
3	I07	AU144340-2	AU144340	1.6502e+06	1.20856e+06
3	I08	BC025779-1	BC025779	1.12414e+06	1.3855e+06
3	I09	AV655948-1	AV655948	755520	2.57311e+06
3	I10	BC025779-2	BC025779	2.40108e+06	3.04165e+06
3	I11	AV655948-1	AV655948	1.30151e+06	2.00773e+06
3	I12	BC026037-3	BC026037	1877664	2.119e+06
3	I13	AW005639-2	AW005639	2.12934e+06	2.81228e+06
3	I14	BC026037-1	BC026037	1.86922e+06	2.20601e+06
3	I15	AW104310-1	AW104310	2401074	3.06221e+06
3	I16	BC026037-2	BC026037	3.02831e+06	2.69837e+06
3	I17	AW118194-1	AW118194	1431807	2.54131e+06
3	I18	BC026157-3	BC026157	1.71459e+06	1.28059e+06
3	I19	AW118194-1	AW118194	2.51378e+06	3.08497e+06
3	I20	BC026157-1	BC026157	2.3719e+06	1.96589e+06
3	I21	AW134548-2	AW134548	3.41408e+06	1.94631e+06
3	I22	BC026157-2	BC026157	2.19401e+06	2005427
3	I23	AW134548-1	AW134548	2.33761e+06	1.66974e+06
3	I24	BC028062-3	BC028062	2521834	1874344
3	J01	BC036929-3	BC036929	1.42552e+06	617818
3	J02	BC047369-3	BC047369	2324142	2.11545e+06
3	J03	BC037167-1	BC037167	1.24141e+06	819288
3	J04	BC047369-1	BC047369	1.73001e+06	1.21528e+06
3	J05	BC037167-1	BC037167	1.6921e+06	1.57142e+06
3	J06	BC047369-2	BC047369	1.95543e+06	1.42032e+06
3	J07	BC037167-2	BC037167	2.1616e+06	2.5554e+06
3	J08	BC047467-3	BC047467	2.00895e+06	1578738
3	J09	BC037797-3	BC037797	3.09967e+06	3098527
3	J10	BC047467-1	BC047467	1.84615e+06	1.8782e+06
3	J11	BC037797-1	BC037797	2.18193e+06	2.0323e+06
3	J12	BC047467-2	BC047467	1566896	1.81422e+06
3	J13	BC037797-2	BC037797	1.83027e+06	2.07512e+06
3	J14	BC047605-3	BC047605	2603534	1.59053e+06
3	J15	BC038383-3	BC038383	2.19566e+06	1.71246e+06
3	J16	BC047605-1	BC047605	1894731	1.92226e+06
3	J17	BC038383-1	BC038383	1.82685e+06	1.83408e+06
3	J18	BC047605-2	BC047605	2.00877e+06	2.03477e+06
3	J19	BC038570-2	BC038570	1.61863e+06	1700548
3	J20	BC047792-3	BC047792	2467258	2.16693e+06
3	J21	BC038570-1	BC038570	2626466	1.94353e+06
3	J22	BC047792-1	BC047792	1.97998e+06	2254953
3	J23	BC038570-2	BC038570	1.61077e+06	1.47265e+06
3	J24	BC047792-2	BC047792	906561	325330
3	K01	AW134548-2	AW134548	5.90643e+06	1.61651e+06
3	K02	BC028062-1	BC028062	3.70104e+06	2.90052e+06
3	K03	AW161256-3	AW161256	3.33716e+06	2.33151e+06
3	K04	BC028062-2	BC028062	1877334	2.12647e+06
3	K05	AW161256-1	AW161256	2573791	2565506
3	K06	BC028334-3	BC028334	2.93469e+06	2.27032e+06
3	K07	AW169893-2	AW169893	1.76658e+06	1.28744e+06
3	K08	BC028334-1	BC028334	1.57352e+06	2.00686e+06
3	K09	AW181942-1	AW181942	2861471	2.08745e+06
3	K10	BC028334-2	BC028334	1440018	2.24527e+06
3	K11	AW181942-1	AW181942	2.33145e+06	1.68279e+06
3	K12	BC028370-3	BC028370	1.5316e+06	2480178
3	K13	AW181942-2	AW181942	3388543	2.04896e+06
3	K14	BC028370-1	BC028370	2.35727e+06	2.43308e+06
3	K15	AW183704-3	AW183704	2818816	2.55185e+06
3	K16	BC028370-2	BC028370	2.1787e+06	1.30761e+06
3	K17	AW183704-1	AW183704	2099751	1.50593e+06
3	K18	BC029294-3	BC029294	2.57406e+06	1.2486e+06
3	K19	AW183704-2	AW183704	3.10222e+06	2.17395e+06
3	K20	BC029294-1	BC029294	4099570	3.1941e+06
3	K21	AW205448-3	AW205448	2.66503e+06	2.08497e+06
3	K22	BC029297-2	BC029297	4.02897e+06	1.89218e+06
3	K23	AW205448-1	AW205448	3704446	3.38951e+06
3	K24	BC029297-1	BC029297	2.73459e+06	2.38309e+06
3	L01	BC038594-3	BC038594	2.37557e+06	987221
3	L02	BC048978-3	BC048978	2.3642e+06	2.6442e+06
3	L03	BC038594-1	BC038594	1.94576e+06	2.18954e+06
3	L04	BC048978-1	BC048978	1484549	995682
3	L05	BC038594-2	BC038594	2.10137e+06	1.75922e+06
3	L06	BC048978-2	BC048978	2.22076e+06	1.35173e+06
3	L07	BC038786-3	BC038786	1438861	1.56158e+06
3	L08	BC048992-3	BC048992	2.12997e+06	1.53371e+06
3	L09	BC038786-1	BC038786	2786401	2.23237e+06
3	L10	BC048992-1	BC048992	3.31667e+06	2744827
3	L11	BC038786-2	BC038786	1.72029e+06	1.15425e+06
3	L12	BC048992-2	BC048992	2143615	2.24313e+06
3	L13	BC039240-3	BC039240	2.08646e+06	1.77498e+06
3	L14	BC050569-3	BC050569	1.57724e+06	1.07848e+06
3	L15	BC039240-1	BC039240	2.79873e+06	1519982
3	L16	BC050569-1	BC050569	2.66966e+06	1.63867e+06
3	L17	BC039399-2	BC039399	1.52236e+06	1.70175e+06
3	L18	BC050569-2	BC050569	2774213	1.97606e+06
3	L19	BC039399-1	BC039399	2.04462e+06	1249735
3	L20	BC051689-3	BC051689	3.69209e+06	2.79601e+06
3	L21	BC039399-2	BC039399	2.47576e+06	1.70535e+06
3	L22	BC051689-1	BC051689	2.07609e+06	2.19265e+06
3	L23	BC039670-3	BC039670	3823654	1.40899e+06
3	L24	BC051689-2	BC051689	1.17697e+06	1.64145e+06
3	M01	AW205448-2	AW205448	1.06059e+06	1.29466e+06
3	M02	BC029297-2	BC029297	1.45956e+06	1967334
3	M03	AW246550-3	AW246550	1.21232e+06	1.48025e+06
3	M04	BC029301-3	BC029301	1.4425e+06	1.31393e+06
3	M05	AW246550-1	AW246550	1.09257e+06	1.83491e+06
3	M06	BC029301-1	BC029301	930699	2.41213e+06
3	M07	AW303426-2	AW303426	1.27116e+06	2.04443e+06
3	M08	BC029301-2	BC029301	1.66812e+06	1.74384e+06
3	M09	AW303426-1	AW303426	1.05964e+06	1.88444e+06
3	M10	BC029846-3	BC029846	1.56172e+06	1.67347e+06
3	M11	AW303426-2	AW303426	1.038e+06	1.39291e+06
3	M12	BC029905-1	BC029905	1.33738e+06	2297657
3	M13	AW341698-3	AW341698	1.37142e+06	2198638
3	M14	BC029905-1	BC029905	1288304	775669
3	M15	AW341698-1	AW341698	1238121	1.30686e+06
3	M16	BC029905-2	BC029905	1.4929e+06	2206071
3	M17	AW341698-2	AW341698	1.07166e+06	947365
3	M18	BC030136-3	BC030136	1.35048e+06	2.28527e+06
3	M19	AW444926-3	AW444926	1.08734e+06	2133049
3	M20	BC030136-1	BC030136	1.14463e+06	1.84461e+06
3	M21	GL3	GL3	102453	99940
3	M22	GL3	GL3	102264	111898
3	M23	GL3	GL3	107729	141921
3	M24	GL3	GL3	90075	124138
3	N01	BC039670-1	BC039670	946499	269569
3	N02	BC051746-3	BC051746	540578	620631
3	N03	BC039670-2	BC039670	310715	914060
3	N04	BC051746-1	BC051746	433736	823213
3	N05	BC040022-3	BC040022	425101	1.77098e+06
3	N06	BC051746-2	BC051746	421540	1.18769e+06
3	N07	BC040208-1	BC040208	747203	1.5004e+06
3	N08	BC051759-3	BC051759	715989	1.76833e+06
3	N09	BC040208-1	BC040208	749800	1.26466e+06
3	N10	BC051759-1	BC051759	1.22835e+06	1.35827e+06
3	N11	BC040208-2	BC040208	943996	1.44572e+06
3	N12	BC051759-2	BC051759	1.3269e+06	1.5981e+06
3	N13	BC040532-3	BC040532	1.19728e+06	2.0014e+06
3	N14	BC052627-3	BC052627	963244	803947
3	N15	BC040532-1	BC040532	1.1579e+06	1.11621e+06
3	N16	BC052627-1	BC052627	1.15238e+06	1.85849e+06
3	N17	BC040532-2	BC040532	886884	1.09525e+06
3	N18	BC052627-2	BC052627	716687	1.99577e+06
3	N19	BC040562-3	BC040562	1.48829e+06	1.10184e+06
3	N20	BC054514-3	BC054514	689382	802657
3	N21	GL3	GL3	53479.4	120353
3	N22	GL3	GL3	60597.6	91407.8
3	N23	GL3	GL3	69283.4	112096
3	N24	GL3	GL3	66130.3	68510.9
3	O01	AW444926-1	AW444926	2.1671e+06	1.69833e+06
3	O02	BC030136-2	BC030136	2786941	2600340
3	O03	AW629502-2	AW629502	2.00095e+06	1.51792e+06
3	O04	BC030292-3	BC030292	1.01526e+06	1.55711e+06
3	O05	AW629502-1	AW629502	1.88817e+06	1.55411e+06
3	O06	BC030292-1	BC030292	1845871	2.52211e+06
3	O07	AW629502-2	AW629502	1.51908e+06	1.15355e+06
3	O08	BC030292-2	BC030292	985352	3.03309e+06
3	O09	AX747518-3	AX747518	2966383	2.83444e+06
3	O10	BC031588-3	BC031588	2.47864e+06	2706288
3	O11	AX747518-1	AX747518	2.36304e+06	1630106
3	O12	BC031588-1	BC031588	2.33179e+06	1.78907e+06
3	O13	AX747518-2	AX747518	3.00582e+06	2.50571e+06
3	O14	BC031588-2	BC031588	2951012	2.23281e+06
3	O15	AX747751-3	AX747751	2.62189e+06	2.67158e+06
3	O16	BC031638-3	BC031638	1.77289e+06	2.11823e+06
3	O17	AX748356-1	AX748356	2.46414e+06	2.19612e+06
3	O18	BC031867-1	BC031867	1.84528e+06	1.30494e+06
3	O19	AX748356-1	AX748356	1.54445e+06	2.01377e+06
3	O20	BC031867-1	BC031867	2.1687e+06	2.00113e+06
3	O21	GL3	GL3	159586	142650
3	O22	GL3	GL3	115161	190861
3	O23	mock	mock	1.70159e+06	1.08649e+06
3	O24	mock	mock	1854109	1.43304e+06
3	P01	BC040562-1	BC040562	848737	1.45507e+06
3	P02	BC054514-1	BC054514	1.97329e+06	1.40455e+06
3	P03	BC040562-2	BC040562	1.10718e+06	1.86334e+06
3	P04	BC054514-2	BC054514	1.68397e+06	1.62516e+06
3	P05	BC041011-3	BC041011	615954	531758
3	P06	BC055092-3	BC055092	1.46304e+06	1.36814e+06
3	P07	BC041011-1	BC041011	3.71699e+06	2.24895e+06
3	P08	BC055092-1	BC055092	2.30493e+06	2.30666e+06
3	P09	BC041011-2	BC041011	2.63117e+06	1970425
3	P10	BC055092-2	BC055092	2.25795e+06	1.74563e+06
3	P11	BC041412-3	BC041412	1873366	2.04252e+06
3	P12	BC058547-3	BC058547	1.99811e+06	1.84138e+06
3	P13	BC041412-1	BC041412	1.71192e+06	1.90623e+06
3	P14	BC058547-1	BC058547	1.31947e+06	1.0816e+06
3	P15	BC041412-2	BC041412	1.96412e+06	2.27889e+06
3	P16	BC058547-2	BC058547	1.96224e+06	1769197
3	P17	BC041581-3	BC041581	1.74908e+06	1331064
3	P18	BC058910-3	BC058910	2.52832e+06	1.40862e+06
3	P19	BC041581-1	BC041581	3.55672e+06	2.68239e+06
3	P20	BC060821-1	BC060821	2.41514e+06	1.49709e+06
3	P21	GL3	GL3	121220	185198
3	P22	GL3	GL3	114321	174620
3	P23	mock	mock	1806133	1.64302e+06
3	P24	mock	mock	1.52181e+06	1.42355e+06
4	A01	BC060821-1	BC060821	5239275	1.47123e+06
4	A02	BF979636-1	BF979636	1778182	1.1975e+06
4	A03	BC060821-2	BC060821	2.72637e+06	2.1372e+06
4	A04	BF979636-2	BF979636	2.70122e+06	1.03189e+06
4	A05	BC063847-3	BC063847	1196980	2.04269e+06
4	A06	BF980328-3	BF980328	3336392	1.35501e+06
4	A07	BC063847-1	BC063847	3.08101e+06	1.98052e+06
4	A08	BF980328-1	BF980328	2.19939e+06	2404880
4	A09	BC063847-2	BC063847	2361074	1.57123e+06
4	A10	BF980328-2	BF980328	1.72542e+06	2.0062e+06
4	A11	BC064332-3	BC064332	3447512	1.50799e+06
4	A12	BF982335-3	BF982335	2.44198e+06	2.0281e+06
4	A13	BC064332-1	BC064332	3.60385e+06	3.02356e+06
4	A14	BF982335-1	BF982335	1.948e+06	1202492
4	A15	BC064332-2	BC064332	1.52287e+06	3.27577e+06
4	A16	BF982335-2	BF982335	2191157	2.03967e+06
4	A17	BC065191-3	BC065191	4302332	1.89816e+06
4	A18	BG031574-3	BG031574	2.84915e+06	1.28934e+06
4	A19	BC065221-1	BC065221	2.67829e+06	1.56227e+06
4	A20	BG031574-1	BG031574	2100208	470428
4	A21	BC065514-1	BC065514	1.99532e+06	2.6451e+06
4	A22	BG031574-2	BG031574	1.41276e+06	1.05246e+06
4	A23	BC065828-1	BC065828	1.95002e+06	1571887
4	A24	BG105175-3	BG105175	225700	409829
4	B01	BI461584-2	BI461584	1380018	1.75746e+06
4	B02	BM682632-1	BM682632	2458761	1.88988e+06
4	B03	BI462164-3	BI462164	1080333	2.88868e+06
4	B04	BM682632-1	BM682632	2.51668e+06	2.6137e+06
4	B05	BI462164-1	BI462164	2364800	962932
4	B06	BM682632-2	BM682632	2.84676e+06	1.43419e+06
4	B07	BI462164-2	BI462164	2.10508e+06	1617386
4	B08	BM685299-3	BM685299	1.41602e+06	1.23007e+06
4	B09	BI462408-3	BI462408	1.97665e+06	1.23461e+06
4	B10	BM714117-1	BM714117	2.66226e+06	2452083
4	B11	BI462408-1	BI462408	1.83817e+06	1.32552e+06
4	B12	BM714117-1	BM714117	2.47209e+06	1.53762e+06
4	B13	BI462408-2	BI462408	2.0022e+06	2.32648e+06
4	B14	BM714117-2	BM714117	2.0201e+06	673996
4	B15	BI464251-3	BI464251	2.60504e+06	1.71657e+06
4	B16	BM715580-3	BM715580	2.92432e+06	2.60622e+06
4	B17	BI464251-1	BI464251	1069840	59349.7
4	B18	BM717234-1	BM717234	1548902	661636
4	B19	BI544251-2	BI544251	2.01296e+06	1.44612e+06
4	B20	BM717234-1	BM717234	2108850	592578
4	B21	BI548336-1	BI548336	2255382	1.61218e+06
4	B22	BM717234-2	BM717234	2.39266e+06	995884
4	B23	BI548336-1	BI548336	1.06192e+06	1.65123e+06
4	B24	BM723462-3	BM723462	1218770	2.30775e+06
4	C01	BC065828-1	BC065828	1.59493e+06	1367187
4	C02	BG105175-1	BG105175	2127856	2.13721e+06
4	C03	BC065828-2	BC065828	1.73237e+06	2.43961e+06
4	C04	BG105175-2	BG105175	1.94938e+06	1.84828e+06
4	C05	BC068567-3	BC068567	1.83564e+06	1.12433e+06
4	C06	BG107047-3	BG107047	1.70671e+06	1.53521e+06
4	C07	BC068567-1	BC068567	3.14118e+06	1515339
4	C08	BG107047-1	BG107047	2.59486e+06	1.95027e+06
4	C09	BC068567-2	BC068567	2335246	1.8254e+06
4	C10	BG107047-2	BG107047	1976968	1.5821e+06
4	C11	BC070067-3	BC070067	2.27538e+06	2.29043e+06
4	C12	BG109945-3	BG109945	1989544	1.53176e+06
4	C13	BC070067-1	BC070067	869169	934123
4	C14	BG109945-1	BG109945	709729	2.02931e+06
4	C15	BC070067-2	BC070067	2.50732e+06	2.03553e+06
4	C16	BG109945-2	BG109945	2618658	2.52743e+06
4	C17	BC070103-3	BC070103	2.21034e+06	1.61911e+06
4	C18	BG177516-3	BG177516	1.90044e+06	2.36322e+06
4	C19	BC070103-1	BC070103	1977856	1.98892e+06
4	C20	BG177516-1	BG177516	1.52734e+06	849227
4	C21	BC070103-2	BC070103	2.95627e+06	1.56141e+06
4	C22	BG177516-2	BG177516	1711809	1.3058e+06
4	C23	BC071752-3	BC071752	2.19973e+06	2.73762e+06
4	C24	BG184610-3	BG184610	825274	1.78726e+06
4	D01	BI548336-2	BI548336	1.50749e+06	1.02577e+06
4	D02	BM723462-1	BM723462	2051857	1.32517e+06
4	D03	BI551905-3	BI551905	1.84137e+06	1.36565e+06
4	D04	BM723462-2	BM723462	1.03573e+06	1089146
4	D05	BI551905-1	BI551905	2.1387e+06	1.83886e+06
4	D06	BM752795-3	BM752795	1.34646e+06	2.35634e+06
4	D07	BI551905-2	BI551905	1.66867e+06	1.76584e+06
4	D08	BM760073-1	BM760073	2.35288e+06	1650554
4	D09	BI562237-3	BI562237	2.03478e+06	2.66222e+06
4	D10	BM797032-1	BM797032	2.36411e+06	1.80131e+06
4	D11	BI562237-1	BI562237	2.87069e+06	1.12472e+06
4	D12	BM797032-1	BM797032	1.37333e+06	1.65683e+06
4	D13	BI562237-2	BI562237	1.85926e+06	1.47135e+06
4	D14	BM797032-2	BM797032	1943554	2.84329e+06
4	D15	BI562397-3	BI562397	1.34477e+06	1.07325e+06
4	D16	BM802003-3	BM802003	2.40281e+06	1.17229e+06
4	D17	BI562397-1	BI562397	1.46181e+06	1.50324e+06
4	D18	BM802003-1	BM802003	1.06228e+06	1.13514e+06
4	D19	BI562397-2	BI562397	1.77322e+06	3.15509e+06
4	D20	BM802003-2	BM802003	1.48531e+06	1.03212e+06
4	D21	BI596851-3	BI596851	2262404	2.02613e+06
4	D22	BM803139-3	BM803139	2.86442e+06	1.6262e+06
4	D23	BI596851-1	BI596851	1.53795e+06	1686064
4	D24	BM803139-1	BM803139	1.91768e+06	1.78835e+06
4	E01	BC071752-1	BC071752	2.09407e+06	1.58694e+06
4	E02	BG207204-1	BG207204	1.63287e+06	1.40516e+06
4	E03	BC071752-2	BC071752	2.54197e+06	1.39075e+06
4	E04	BG207204-1	BG207204	2.1042e+06	1.83052e+06
4	E05	BC072670-3	BC072670	2.46557e+06	506635
4	E06	BG207204-2	BG207204	1.50469e+06	1.91793e+06
4	E07	BC072670-1	BC072670	2.23849e+06	2.15678e+06
4	E08	BG215466-3	BG215466	2.39015e+06	1.05922e+06
4	E09	BC072670-2	BC072670	2479031	2.09574e+06
4	E10	BG329805-1	BG329805	1.6491e+06	1.54856e+06
4	E11	BC073157-3	BC073157	1.5704e+06	1.25494e+06
4	E12	BG329805-1	BG329805	2.30655e+06	2.16021e+06
4	E13	BC073157-1	BC073157	1.53626e+06	1.74009e+06
4	E14	BG329805-2	BG329805	1.7597e+06	1.19766e+06
4	E15	BC073157-2	BC073157	2017432	2.40843e+06
4	E16	BG401569-3	BG401569	1978888	2022792
4	E17	BC081539-3	BC081539	2840810	2.37322e+06
4	E18	BG401569-1	BG401569	1.63316e+06	2.04107e+06
4	E19	BE048858-1	BE048858	1.12509e+06	1.96745e+06
4	E20	BG422817-2	BG422817	1717172	1.09625e+06
4	E21	BE048858-1	BE048858	2.37092e+06	1.94207e+06
4	E22	BG422817-1	BG422817	1.20208e+06	2.60794e+06
4	E23	BE220031-2	BE220031	2.15419e+06	1.96795e+06
4	E24	BG422817-2	BG422817	952064	633637
4	F01	BI596851-2	BI596851	1053436	817819
4	F02	BM803139-2	BM803139	1.45933e+06	943807
4	F03	BI751989-3	BI751989	1427061	1577050
4	F04	BM825411-3	BM825411	843421	1.52339e+06
4	F05	BI751989-1	BI751989	1.6319e+06	1247486
4	F06	BM825411-1	BM825411	1.18368e+06	1.61821e+06
4	F07	BI758673-2	BI758673	1.38742e+06	1665534
4	F08	BM825411-2	BM825411	1.78462e+06	1.65395e+06
4	F09	BI758673-1	BI758673	2.46944e+06	2.72735e+06
4	F10	BM835539-3	BM835539	1.72493e+06	1.4689e+06
4	F11	BI758673-2	BI758673	2908940	2.3471e+06
4	F12	BM835539-1	BM835539	1.58927e+06	1.76304e+06
4	F13	BI761521-3	BI761521	2.3076e+06	2.99495e+06
4	F14	BM835539-2	BM835539	2.56997e+06	2.31672e+06
4	F15	BI761521-1	BI761521	2.21139e+06	2.20236e+06
4	F16	BM844241-3	BM844241	1.9146e+06	1.44516e+06
4	F17	BI761530-2	BI761530	945371	1.02829e+06
4	F18	BM873557-1	BM873557	2.58978e+06	1.571e+06
4	F19	BI761530-1	BI761530	2332294	1.67862e+06
4	F20	BM873557-1	BM873557	2.10788e+06	1.59943e+06
4	F21	BI761530-2	BI761530	2.20224e+06	1563066
4	F22	BM909113-2	BM909113	2.14967e+06	2.14347e+06
4	F23	BI763942-3	BI763942	2.20783e+06	1.49066e+06
4	F24	BM909559-1	BM909559	2.31376e+06	1.90442e+06
4	G01	BE220031-1	BE220031	4.13671e+06	2488851
4	G02	BG431163-3	BG431163	1.47489e+06	1.13043e+06
4	G03	BE220031-2	BE220031	2.47529e+06	2.23483e+06
4	G04	BG431163-1	BG431163	1.33814e+06	1.45939e+06
4	G05	BE253544-3	BE253544	2.21423e+06	2326404
4	G06	BG431163-2	BG431163	1.78227e+06	1.7248e+06
4	G07	BE253544-1	BE253544	2.16522e+06	1.79685e+06
4	G08	BG431910-3	BG431910	1.74756e+06	841388
4	G09	BE253544-2	BE253544	2.32085e+06	1.61897e+06
4	G10	BG431910-1	BG431910	1.60561e+06	1.40207e+06
4	G11	BE302996-3	BE302996	2.41818e+06	2.47764e+06
4	G12	BG431910-2	BG431910	1437069	1.3878e+06
4	G13	BE302996-1	BE302996	2.2043e+06	1.69316e+06
4	G14	BG489265-3	BG489265	1.84917e+06	875216
4	G15	BE302996-2	BE302996	2.15439e+06	2.2615e+06
4	G16	BG489265-1	BG489265	1.97552e+06	1.58469e+06
4	G17	BE327994-3	BE327994	2.48433e+06	1.30924e+06
4	G18	BG548248-2	BG548248	2672610	1.26383e+06
4	G19	BE327994-1	BE327994	3.12381e+06	1.95919e+06
4	G20	BG548248-1	BG548248	3100255	1.17806e+06
4	G21	BE349850-2	BE349850	3.33955e+06	2.22121e+06
4	G22	BG548248-2	BG548248	2.65336e+06	1852716
4	G23	BE392698-1	BE392698	2.77765e+06	2.37507e+06
4	G24	BG697350-3	BG697350	440556	643444
4	H01	BI763942-1	BI763942	736883	858715
4	H02	BM920013-1	BM920013	1.38472e+06	1.34804e+06
4	H03	BI763942-2	BI763942	912132	1.0429e+06
4	H04	BM920013-1	BM920013	1.05615e+06	1.75255e+06
4	H05	BI768875-3	BI768875	1.34149e+06	1.53411e+06
4	H06	BM920013-2	BM920013	1701146	1.26536e+06
4	H07	BI770775-1	BI770775	2200226	1.55322e+06
4	H08	BM975869-3	BM975869	1.41472e+06	1.60062e+06
4	H09	BI770775-1	BI770775	2.80665e+06	1.51312e+06
4	H10	BM981128-1	BM981128	2.42066e+06	2.99022e+06
4	H11	BI770775-2	BI770775	1.52523e+06	2.02713e+06
4	H12	BM981128-1	BM981128	1.30408e+06	1.49725e+06
4	H13	BI825654-3	BI825654	2.04416e+06	2.17011e+06
4	H14	BM981128-2	BM981128	3.07548e+06	2.59113e+06
4	H15	BI828209-1	BI828209	2.01084e+06	1.60318e+06
4	H16	BM997053-3	BM997053	1.83746e+06	1.27062e+06
4	H17	BI828738-1	BI828738	1.73279e+06	1.98912e+06
4	H18	BM997053-1	BM997053	2.1616e+06	2715568
4	H19	BI828738-1	BI828738	2.32536e+06	2021931
4	H20	BM997053-2	BM997053	1.53097e+06	1.49152e+06
4	H21	BI828738-2	BI828738	2346360	2.55029e+06
4	H22	BM999307-3	BM999307	1.94583e+06	2.48733e+06
4	H23	BI829394-3	BI829394	1.44404e+06	1.12686e+06
4	H24	BM999307-1	BM999307	1.9358e+06	2.58355e+06
4	I01	BE393203-1	BE393203	1.00722e+06	37167.8
4	I02	BG701915-1	BG701915	563341	1.79455e+06
4	I03	BE393203-1	BE393203	2204782	2.28668e+06
4	I04	BG701915-1	BG701915	1.87684e+06	2278334
4	I05	BE393203-2	BE393203	2.04981e+06	1.84785e+06
4	I06	BG701915-2	BG701915	2.90545e+06	1.57431e+06
4	I07	BE467111-3	BE467111	1.4813e+06	1.32409e+06
4	I08	BG703444-3	BG703444	1912877	1.46027e+06
4	I09	BE467111-1	BE467111	1.81224e+06	778100
4	I10	BG703444-1	BG703444	2199814	1.7056e+06
4	I11	BE467111-2	BE467111	2.17748e+06	719413
4	I12	BG703444-2	BG703444	1.78232e+06	1.55862e+06
4	I13	BE503994-3	BE503994	2804903	3239878
4	I14	BG718375-3	BG718375	2.23939e+06	1832267
4	I15	BE676309-1	BE676309	1.92936e+06	2.13268e+06
4	I16	BG718375-1	BG718375	556095	1.74237e+06
4	I17	BE676309-1	BE676309	1.55674e+06	1.83041e+06
4	I18	BG718375-2	BG718375	1.41371e+06	1.95443e+06
4	I19	BE676309-2	BE676309	2.7381e+06	1.95527e+06
4	I20	BG719278-3	BG719278	1.74666e+06	1.25952e+06
4	I21	BE731425-3	BE731425	2.61654e+06	1.65568e+06
4	I22	BG719278-1	BG719278	1.10997e+06	1.33957e+06
4	I23	BE731425-1	BE731425	1.82472e+06	1.88129e+06
4	I24	BG719278-2	BG719278	1.28271e+06	1.31084e+06
4	J01	BI829394-1	BI829394	1816083	873597
4	J02	BP220387-2	BP220387	1222421	1.53167e+06
4	J03	BI829394-2	BI829394	1.53421e+06	1.84002e+06
4	J04	BP226882-1	BP226882	2.79431e+06	2.03748e+06
4	J05	BI829778-3	BI829778	2.1163e+06	1.81783e+06
4	J06	BP299886-1	BP299886	2.07239e+06	1.37254e+06
4	J07	BI829778-1	BI829778	1.8427e+06	1.59864e+06
4	J08	BP299886-1	BP299886	1.80074e+06	1.4156e+06
4	J09	BI829778-2	BI829778	2269777	1.57811e+06
4	J10	BP299886-2	BP299886	3.17735e+06	2.89552e+06
4	J11	BI832169-3	BI832169	2.07591e+06	1.999e+06
4	J12	BP309323-3	BP309323	1.50106e+06	1.82152e+06
4	J13	BI832169-1	BI832169	2292514	2.34128e+06
4	J14	BP309323-1	BP309323	1.96311e+06	1.75852e+06
4	J15	BI832169-2	BI832169	1.95332e+06	1.51343e+06
4	J16	BP356683-2	BP356683	1.56713e+06	1.12795e+06
4	J17	BI838705-3	BI838705	1.87054e+06	842228
4	J18	BP356683-1	BP356683	2.7696e+06	1.97564e+06
4	J19	BI838705-1	BI838705	1.92858e+06	1.04587e+06
4	J20	BP358103-2	BP358103	1.95588e+06	1.55668e+06
4	J21	BI838705-2	BI838705	1.99604e+06	1.74563e+06
4	J22	BP872654-1	BP872654	1.90045e+06	1791326
4	J23	BI909810-3	BI909810	2.29335e+06	2319207
4	J24	BQ000843-1	BQ000843	2.66787e+06	1.184e+06
4	K01	BE731425-2	BE731425	1997360	555767
4	K02	BG723928-3	BG723928	1.46841e+06	1.16012e+06
4	K03	BE798820-3	BE798820	2.16799e+06	2153617
4	K04	BG771920-1	BG771920	2.43453e+06	844452
4	K05	BE798820-1	BE798820	1.23105e+06	1.64827e+06
4	K06	BG773262-1	BG773262	2.18921e+06	1057408
4	K07	BE798820-2	BE798820	2.55321e+06	952295
4	K08	BG773262-1	BG773262	2.85939e+06	2.37462e+06
4	K09	BE901447-3	BE901447	1.48767e+06	2222131
4	K10	BG773262-2	BG773262	2416127	2300002
4	K11	BE901447-1	BE901447	1.78907e+06	2.26824e+06
4	K12	BG778161-3	BG778161	2.18871e+06	2.66493e+06
4	K13	BF306383-2	BF306383	1.89782e+06	1.57003e+06
4	K14	BG818213-1	BG818213	1.95624e+06	876574
4	K15	BF306383-1	BF306383	1899882	1998171
4	K16	BG818213-1	BG818213	1357425	1.85422e+06
4	K17	BF306383-2	BF306383	1.55498e+06	1.95262e+06
4	K18	BG818213-2	BG818213	2.03244e+06	1.30885e+06
4	K19	BF313701-3	BF313701	1377623	990992
4	K20	BG827246-3	BG827246	1920082	1.84031e+06
4	K21	BF339050-1	BF339050	1.354e+06	1.88663e+06
4	K22	BG827246-1	BG827246	2.27293e+06	2.42135e+06
4	K23	BF339050-1	BF339050	2364864	2.18226e+06
4	K24	BG827246-2	BG827246	264048	231354
4	L01	BI909891-1	BI909891	1696053	1.80184e+06
4	L02	BQ000843-1	BQ000843	1.60486e+06	968663
4	L03	BI909891-1	BI909891	1869047	1.4975e+06
4	L04	BQ000843-2	BQ000843	1.16523e+06	979382
4	L05	BI909891-2	BI909891	1.55279e+06	1.64301e+06
4	L06	BQ007699-3	BQ007699	2.92314e+06	2.42545e+06
4	L07	BI913313-3	BI913313	1.81008e+06	2.01292e+06
4	L08	BQ007699-1	BQ007699	1.7084e+06	1.47011e+06
4	L09	BI913313-1	BI913313	1.78684e+06	1.9421e+06
4	L10	BQ007699-2	BQ007699	3.6702e+06	2.36923e+06
4	L11	BI913313-2	BI913313	3131698	1.9012e+06
4	L12	BQ015193-3	BQ015193	1.51168e+06	1.85542e+06
4	L13	BM149750-3	BM149750	2293026	2.00639e+06
4	L14	BQ015193-1	BQ015193	1938243	2.16872e+06
4	L15	BM149750-1	BM149750	1.73009e+06	1.6091e+06
4	L16	BQ015193-2	BQ015193	2.15058e+06	1.31713e+06
4	L17	BM149750-2	BM149750	2.42312e+06	1.66111e+06
4	L18	BQ024805-3	BQ024805	2.3255e+06	1.25192e+06
4	L19	BM459353-3	BM459353	1744061	1662232
4	L20	BQ024805-1	BQ024805	1.56524e+06	1.73367e+06
4	L21	BM459353-1	BM459353	2.18566e+06	1.92212e+06
4	L22	BQ024805-2	BQ024805	3065362	1.44705e+06
4	L23	BM459353-2	BM459353	2.18227e+06	1.84269e+06
4	L24	BQ057854-3	BQ057854	2284057	2.19417e+06
4	M01	BF339050-2	BF339050	1952935	1.10094e+06
4	M02	BG829700-3	BG829700	1271742	883548
4	M03	BF435750-3	BF435750	1.74342e+06	1.61902e+06
4	M04	BG829700-1	BG829700	2.15976e+06	896541
4	M05	BF435750-1	BF435750	1.85239e+06	1.29472e+06
4	M06	BG829700-2	BG829700	1.19558e+06	1.39544e+06
4	M07	BF508344-2	BF508344	2.30512e+06	930933
4	M08	BI086262-3	BI086262	1738950	1.27216e+06
4	M09	BF508344-1	BF508344	2327851	1452052
4	M10	BI086262-1	BI086262	1.72452e+06	1.30659e+06
4	M11	BF673043-2	BF673043	3.15687e+06	1.32477e+06
4	M12	BI086262-2	BI086262	1.35059e+06	893546
4	M13	BF673043-1	BF673043	1.94832e+06	1.47408e+06
4	M14	BI114370-3	BI114370	2.14718e+06	1.13413e+06
4	M15	BF673043-2	BF673043	3.09302e+06	1150254
4	M16	BI114370-1	BI114370	2.1331e+06	1.30011e+06
4	M17	BF678123-3	BF678123	2353116	1.43357e+06
4	M18	BI114370-2	BI114370	2062600	1.31692e+06
4	M19	BF678123-1	BF678123	2.36714e+06	1485832
4	M20	BI118180-3	BI118180	1.28255e+06	1279561
4	M21	GL3	GL3	179194	90761.9
4	M22	GL3	GL3	139322	76493.2
4	M23	GL3	GL3	145644	90678.4
4	M24	GL3	GL3	147093	54152.7
4	N01	BM473700-3	BM473700	872030	1.16524e+06
4	N02	BQ082534-1	BQ082534	1.00702e+06	725309
4	N03	BM473700-1	BM473700	1.19623e+06	875728
4	N04	BQ182661-1	BQ182661	1.19497e+06	751690
4	N05	BM473700-2	BM473700	1.28741e+06	621436
4	N06	BQ215910-1	BQ215910	1.305e+06	719831
4	N07	BM474343-3	BM474343	1.60375e+06	948382
4	N08	BQ215910-1	BQ215910	1.87588e+06	1.5068e+06
4	N09	BM474343-1	BM474343	1.93438e+06	1.14296e+06
4	N10	BQ215910-2	BQ215910	1.70218e+06	1.13453e+06
4	N11	BM474343-2	BM474343	1.86961e+06	1296789
4	N12	BQ220962-3	BQ220962	1757656	1609828
4	N13	BM505055-3	BM505055	1.71056e+06	1.74482e+06
4	N14	BQ220962-1	BQ220962	1.31575e+06	1.02543e+06
4	N15	BM505055-1	BM505055	1.64688e+06	835366
4	N16	BQ220962-2	BQ220962	1.68784e+06	813407
4	N17	BM505055-2	BM505055	2337634	1.43686e+06
4	N18	BQ432431-3	BQ432431	2.27109e+06	2.12155e+06
4	N19	BM550311-3	BM550311	1.87481e+06	523510
4	N20	BQ432431-1	BQ432431	1.42945e+06	1.19676e+06
4	N21	GL3	GL3	157928	57121.7
4	N22	GL3	GL3	141219	81148.1
4	N23	GL3	GL3	102184	45560.9
4	N24	GL3	GL3	112904	68076.2
4	O01	BF678123-2	BF678123	2.21567e+06	605287
4	O02	BI118180-1	BI118180	1.12863e+06	1.04884e+06
4	O03	BF964791-3	BF964791	2.16014e+06	1.90947e+06
4	O04	BI118180-2	BI118180	2.88404e+06	1.00045e+06
4	O05	BF964791-1	BF964791	1501204	822001
4	O06	BI255921-3	BI255921	3.01436e+06	3.13949e+06
4	O07	BF972193-2	BF972193	1.28675e+06	1870320
4	O08	BI255921-1	BI255921	1.87613e+06	1.17679e+06
4	O09	BF972193-1	BF972193	3.17819e+06	1900073
4	O10	BI255921-2	BI255921	1.9962e+06	2.07745e+06
4	O11	BF972193-2	BF972193	3.43616e+06	2.01835e+06
4	O12	BI460399-3	BI460399	2.16116e+06	2.49157e+06
4	O13	BF979634-3	BF979634	2.55513e+06	2.0195e+06
4	O14	BI460399-1	BI460399	2.09681e+06	1.28355e+06
4	O15	BF979634-1	BF979634	2.01265e+06	2.26974e+06
4	O16	BI460399-2	BI460399	1.75038e+06	1.48327e+06
4	O17	BF979634-2	BF979634	3.33146e+06	2.75041e+06
4	O18	BI461584-3	BI461584	3677613	1.05989e+06
4	O19	BF979636-3	BF979636	1.79574e+06	2.77259e+06
4	O20	BI461584-1	BI461584	2.65539e+06	1.2546e+06
4	O21	GL3	GL3	143011	77386.1
4	O22	GL3	GL3	110052	93079.8
4	O23	mock	mock	348018	303216
4	O24	mock	mock	138778	137391
4	P01	BM550311-1	BM550311	1.28023e+06	1.86526e+06
4	P02	BQ432431-2	BQ432431	1.62689e+06	2.07678e+06
4	P03	BM550311-2	BM550311	1.48992e+06	1.7106e+06
4	P04	BQ679860-3	BQ679860	1.68702e+06	807542
4	P05	BM564298-3	BM564298	2172575	2.1137e+06
4	P06	BQ943201-1	BQ943201	1.74349e+06	1815775
4	P07	BM564298-1	BM564298	2.43818e+06	2.25998e+06
4	P08	BQ943201-1	BQ943201	2.86806e+06	2.79313e+06
4	P09	BM564298-2	BM564298	2.8945e+06	1.87249e+06
4	P10	BQ943201-2	BQ943201	2.14327e+06	1.35914e+06
4	P11	BM564366-3	BM564366	2.82431e+06	2.04251e+06
4	P12	BU150229-3	BU150229	1.6809e+06	1.12661e+06
4	P13	BM662912-1	BM662912	1.94772e+06	1.01919e+06
4	P14	BU150229-1	BU150229	2019571	2.07899e+06
4	P15	BM662912-1	BM662912	2454718	1.86922e+06
4	P16	BU150229-2	BU150229	2.74287e+06	1.64562e+06
4	P17	BM662912-2	BM662912	1.82579e+06	1.36099e+06
4	P18	BU150385-3	BU150385	1.95798e+06	1.80503e+06
4	P19	BM679630-3	BM679630	2.28258e+06	1.2368e+06
4	P20	BU150385-1	BU150385	848755	1.91909e+06
4	P21	GL3	GL3	127126	104093
4	P22	GL3	GL3	86658	94856.7
4	P23	mock	mock	1.72347e+06	1171187
4	P24	mock	mock	1.2576e+06	1309052
5	A01	BU150385-2	BU150385	1.77884e+06	1.20263e+06
5	A02	BX538250-1	BX538250	1.50687e+06	1.77899e+06
5	A03	BU154247-3	BU154247	1.79099e+06	2139336
5	A04	BX538250-2	BX538250	2.49026e+06	2.42596e+06
5	A05	BU154247-1	BU154247	2.05581e+06	2533672
5	A06	BX644172-3	BX644172	1.4281e+06	1.38756e+06
5	A07	BU154247-2	BU154247	1234191	2.14397e+06
5	A08	BX644172-1	BX644172	2.46234e+06	2920319
5	A09	BU177253-3	BU177253	3000110	3.43949e+06
5	A10	BX644172-2	BX644172	1.69077e+06	1.67687e+06
5	A11	BU177253-1	BU177253	2.38235e+06	2.47547e+06
5	A12	BX647079-3	BX647079	1.68148e+06	1.80549e+06
5	A13	BU177253-2	BU177253	1.81606e+06	2.44738e+06
5	A14	BX647079-1	BX647079	2.75326e+06	2.68091e+06
5	A15	BU182495-3	BU182495	1.70967e+06	1713566
5	A16	BX647079-2	BX647079	1.74696e+06	2.35642e+06
5	A17	BU189319-1	BU189319	718990	1.04037e+06
5	A18	BX647083-3	BX647083	1.80212e+06	2.07031e+06
5	A19	BU507999-1	BU507999	2.2594e+06	2.27178e+06
5	A20	BX647083-1	BX647083	3.56199e+06	3.02639e+06
5	A21	BU507999-1	BU507999	2099633	1.73491e+06
5	A22	BX647083-2	BX647083	887127	1.56527e+06
5	A23	BU507999-2	BU507999	1.89448e+06	1.12913e+06
5	A24	BX647197-3	BX647197	1.89187e+06	1789267
5	B01	CB046508-1	CB046508	1.20542e+06	1.1124e+06
5	B02	CR590857-3	CR590857	1.61451e+06	1918967
5	B03	CB121890-1	CB121890	1.8611e+06	1.82729e+06
5	B04	CR590857-1	CR590857	1.90569e+06	2.12607e+06
5	B05	CB122240-1	CB122240	1.68558e+06	1.04904e+06
5	B06	CR590857-2	CR590857	937252	69238.9
5	B07	CB122240-1	CB122240	1825732	2.26039e+06
5	B08	CR591264-3	CR591264	2.32312e+06	2.27475e+06
5	B09	CB122240-2	CB122240	1.68317e+06	1.825e+06
5	B10	CR591264-1	CR591264	2.09573e+06	1.08489e+06
5	B11	CB134700-3	CB134700	1.65089e+06	2425909
5	B12	CR591264-2	CR591264	2.15424e+06	1.7212e+06
5	B13	CB134700-1	CB134700	1.7263e+06	2.08327e+06
5	B14	CR591575-3	CR591575	2.81174e+06	2270371
5	B15	CB134700-2	CB134700	2.90798e+06	1.81676e+06
5	B16	CR591575-1	CR591575	1.26788e+06	2.32194e+06
5	B17	CB960709-3	CB960709	2.21481e+06	2.39783e+06
5	B18	CR591575-2	CR591575	1.66283e+06	1.31494e+06
5	B19	CB960709-1	CB960709	1.94922e+06	1.94915e+06
5	B20	CR591956-3	CR591956	1.8923e+06	2.36467e+06
5	B21	CB960709-2	CB960709	1.24864e+06	1.28247e+06
5	B22	CR591956-1	CR591956	1.77744e+06	2.35637e+06
5	B23	CB960814-3	CB960814	2.47437e+06	2.50633e+06
5	B24	CR591956-2	CR591956	2.07334e+06	2.18549e+06
5	C01	BU566442-3	BU566442	2.28296e+06	2946212
5	C02	BX647197-1	BX647197	1.11531e+06	2542916
5	C03	BU568414-1	BU568414	1.87597e+06	1.52606e+06
5	C04	BX647197-2	BX647197	2.44247e+06	2737994
5	C05	BU568414-1	BU568414	1.44696e+06	1.35901e+06
5	C06	BX647209-3	BX647209	2.36129e+06	2.58824e+06
5	C07	BU568414-2	BU568414	2299660	2448372
5	C08	BX647209-1	BX647209	1.37784e+06	1.06621e+06
5	C09	BU587659-3	BU587659	1746071	2.18862e+06
5	C10	BX647209-2	BX647209	2824052	2.51333e+06
5	C11	BU587659-1	BU587659	2.04718e+06	1.97707e+06
5	C12	BX647242-3	BX647242	2.09519e+06	2.04209e+06
5	C13	BU587659-2	BU587659	1.47469e+06	2.12884e+06
5	C14	BX647242-1	BX647242	1776574	1.27378e+06
5	C15	BU620128-3	BU620128	2.43616e+06	3.11545e+06
5	C16	BX647242-2	BX647242	1.76454e+06	2.08514e+06
5	C17	BU621106-1	BU621106	3.28487e+06	2.86678e+06
5	C18	BX647258-3	BX647258	1.35431e+06	2114073
5	C19	BU633092-1	BU633092	2.25044e+06	881432
5	C20	BX647258-1	BX647258	3.29051e+06	2.7879e+06
5	C21	BU732008-1	BU732008	1.96808e+06	1.54176e+06
5	C22	BX647258-2	BX647258	2.45297e+06	1.77783e+06
5	C23	BU732008-1	BU732008	1.74173e+06	1.99699e+06
5	C24	BX647304-3	BX647304	1.9804e+06	1.06864e+06
5	D01	CB960814-1	CB960814	748733	1.41598e+06
5	D02	CR592178-3	CR592178	1.27278e+06	889385
5	D03	CB960814-2	CB960814	1.28411e+06	1.5182e+06
5	D04	CR592178-1	CR592178	933169	1.02317e+06
5	D05	CB989077-3	CB989077	1.8861e+06	1.73951e+06
5	D06	CR592178-2	CR592178	1.52335e+06	1.51118e+06
5	D07	CB989594-1	CB989594	1.64638e+06	1.57674e+06
5	D08	CR592483-3	CR592483	1.8802e+06	658410
5	D09	CB995072-1	CB995072	1.05132e+06	1.71146e+06
5	D10	CR592483-1	CR592483	1.80866e+06	1.73112e+06
5	D11	CB995072-1	CB995072	1.78658e+06	1.52679e+06
5	D12	CR592483-2	CR592483	2574308	2607452
5	D13	CB995072-2	CB995072	2.03905e+06	2.00733e+06
5	D14	CR594337-3	CR594337	2735279	998670
5	D15	CB996838-3	CB996838	1.4724e+06	1.91583e+06
5	D16	CR594337-1	CR594337	1.19985e+06	1617498
5	D17	CB996838-1	CB996838	1.61114e+06	1.55176e+06
5	D18	CR594337-2	CR594337	2.22013e+06	1.84985e+06
5	D19	CB996838-2	CB996838	1.98869e+06	2.64837e+06
5	D20	CR594469-3	CR594469	1.95265e+06	774419
5	D21	CD105088-3	CD105088	826995	1.56291e+06
5	D22	CR594469-1	CR594469	1.25486e+06	1846220
5	D23	CD105088-1	CD105088	1.73074e+06	2.32513e+06
5	D24	CR594469-2	CR594469	1.92663e+06	3.16844e+06
5	E01	BU732008-2	BU732008	1.86116e+06	2.15438e+06
5	E02	BX647304-1	BX647304	1.48906e+06	1.72665e+06
5	E03	BU740481-3	BU740481	1.78012e+06	1.74125e+06
5	E04	BX647304-2	BX647304	1.82062e+06	1.67241e+06
5	E05	BU740481-1	BU740481	1588664	1771936
5	E06	BX647327-3	BX647327	1.59189e+06	1632358
5	E07	BU740481-2	BU740481	1.7076e+06	1.43866e+06
5	E08	BX647327-1	BX647327	1473619	1.34124e+06
5	E09	BU852969-3	BU852969	2.26503e+06	2.16641e+06
5	E10	BX647327-2	BX647327	1.69102e+06	1.41878e+06
5	E11	BU852969-1	BU852969	2718230	2110959
5	E12	BX647352-3	BX647352	1.53791e+06	1.35873e+06
5	E13	BU852969-2	BU852969	1.40812e+06	1.41435e+06
5	E14	BX647352-1	BX647352	1.95006e+06	1.7171e+06
5	E15	BX090868-3	BX090868	2.16024e+06	1.47074e+06
5	E16	BX647352-2	BX647352	1.94749e+06	1.94119e+06
5	E17	BX091541-1	BX091541	1.67865e+06	2.08538e+06
5	E18	BX647371-3	BX647371	1.80473e+06	1.98162e+06
5	E19	BX091541-1	BX091541	2.22453e+06	2.31322e+06
5	E20	BX647371-1	BX647371	1.79917e+06	1.5556e+06
5	E21	BX091541-2	BX091541	1.90241e+06	1.50097e+06
5	E22	BX647371-2	BX647371	2227893	1.69274e+06
5	E23	BX097319-3	BX097319	1.73861e+06	1.84785e+06
5	E24	BX647402-3	BX647402	1.481e+06	1.43494e+06
5	F01	CD105088-2	CD105088	546063	514330
5	F02	CR594526-3	CR594526	752042	1.06982e+06
5	F03	CD171782-3	CD171782	847916	883346
5	F04	CR594526-1	CR594526	779859	964366
5	F05	CD171782-1	CD171782	907412	989388
5	F06	CR594526-2	CR594526	1.50449e+06	1.31861e+06
5	F07	CD171782-2	CD171782	1.18103e+06	1.07354e+06
5	F08	CR594841-3	CR594841	1168728	1.19352e+06
5	F09	CD176148-3	CD176148	1.22838e+06	1.39961e+06
5	F10	CR594841-1	CR594841	1.43714e+06	1.86809e+06
5	F11	CD176148-1	CD176148	1.88531e+06	1.32719e+06
5	F12	CR594841-2	CR594841	1.29188e+06	1.30271e+06
5	F13	CD176148-2	CD176148	1.52631e+06	1.39705e+06
5	F14	CR595030-3	CR595030	1.59059e+06	1.49685e+06
5	F15	CD300479-3	CD300479	1.54447e+06	1.16843e+06
5	F16	CR595030-1	CR595030	1.70771e+06	1.23144e+06
5	F17	CD300479-1	CD300479	1.25899e+06	1.64047e+06
5	F18	CR595030-2	CR595030	2.54439e+06	1.94231e+06
5	F19	CD300479-2	CD300479	1.85315e+06	1512141
5	F20	CR596106-3	CR596106	1.58966e+06	1.55629e+06
5	F21	CD358294-3	CD358294	1.68622e+06	1.85056e+06
5	F22	CR596106-1	CR596106	1.81627e+06	1.3313e+06
5	F23	CD358294-1	CD358294	1.54872e+06	1482432
5	F24	CR596106-2	CR596106	1.97531e+06	897511
5	G01	BX099352-1	BX099352	889700	1.31766e+06
5	G02	BX647402-1	BX647402	1082855	1.38819e+06
5	G03	BX103104-1	BX103104	1.19525e+06	1.41488e+06
5	G04	BX647402-2	BX647402	1.94737e+06	1.66327e+06
5	G05	BX103104-1	BX103104	1.30917e+06	981712
5	G06	BX647755-3	BX647755	1.71034e+06	1.71672e+06
5	G07	BX103104-2	BX103104	1.26556e+06	1.47408e+06
5	G08	BX647755-1	BX647755	1.81911e+06	1.41783e+06
5	G09	BX108565-3	BX108565	1.95361e+06	1.68533e+06
5	G10	BX647755-2	BX647755	1.54344e+06	1.29656e+06
5	G11	BX280692-1	BX280692	1.40701e+06	1.2539e+06
5	G12	BX647788-3	BX647788	1466966	1.42147e+06
5	G13	BX280692-1	BX280692	2.16769e+06	1.77554e+06
5	G14	BX647788-1	BX647788	2.14221e+06	1.52989e+06
5	G15	BX280692-2	BX280692	1.78751e+06	1704471
5	G16	BX647788-2	BX647788	2.1716e+06	1.94147e+06
5	G17	BX334837-3	BX334837	1501349	1.68776e+06
5	G18	BX647936-3	BX647936	1.56283e+06	1.405e+06
5	G19	BX338266-1	BX338266	1.69813e+06	1.65038e+06
5	G20	BX647936-1	BX647936	2.25827e+06	1.49102e+06
5	G21	BX349946-1	BX349946	1.58704e+06	1.57613e+06
5	G22	BX647936-2	BX647936	2.71041e+06	2300140
5	G23	BX353756-1	BX353756	2200258	1139075
5	G24	BX647947-3	BX647947	1.47651e+06	1.31517e+06
5	H01	CD358294-2	CD358294	548424	396667
5	H02	CR596126-3	CR596126	1.19724e+06	1.27199e+06
5	H03	CD365509-3	CD365509	984740	1.35506e+06
5	H04	CR596126-1	CR596126	799708	1403804
5	H05	CD365509-1	CD365509	1.11987e+06	1.52189e+06
5	H06	CR596126-2	CR596126	918603	1.14372e+06
5	H07	CD365509-2	CD365509	1.26055e+06	1.28821e+06
5	H08	CR596164-3	CR596164	1.24966e+06	1.1316e+06
5	H09	CD387847-3	CD387847	1.51246e+06	1.60066e+06
5	H10	CR596164-1	CR596164	1.38928e+06	1.37809e+06
5	H11	CD387847-1	CD387847	1420292	1412064
5	H12	CR596164-2	CR596164	1.45291e+06	1.39048e+06
5	H13	CD387847-2	CD387847	1.38354e+06	1.36112e+06
5	H14	CR596588-3	CR596588	1.79257e+06	1.43204e+06
5	H15	CD520440-3	CD520440	1.6095e+06	1.72429e+06
5	H16	CR596588-1	CR596588	1.60373e+06	1.55852e+06
5	H17	CD520440-1	CD520440	1.13499e+06	1.17439e+06
5	H18	CR596588-2	CR596588	1383678	1.59046e+06
5	H19	CD520440-2	CD520440	1.11984e+06	746389
5	H20	CR596712-3	CR596712	2.09538e+06	1.09405e+06
5	H21	CD557459-3	CD557459	1.41871e+06	1.24993e+06
5	H22	CR596712-1	CR596712	1.76862e+06	1.40134e+06
5	H23	CD613382-1	CD613382	1.64482e+06	1.37e+06
5	H24	CR596712-2	CR596712	1.52626e+06	1449994
5	I01	BX353756-1	BX353756	1.5659e+06	1.91028e+06
5	I02	BX648432-1	BX648432	1.93371e+06	1.64126e+06
5	I03	BX353756-2	BX353756	1.83903e+06	1.47601e+06
5	I04	BX648486-1	BX648486	1.42361e+06	1.14689e+06
5	I05	BX355581-3	BX355581	1.59848e+06	1.62895e+06
5	I06	BX648486-1	BX648486	1.4454e+06	1400448
5	I07	BX355581-1	BX355581	1.58454e+06	1595256
5	I08	BX648486-2	BX648486	2.01103e+06	1.86827e+06
5	I09	BX355581-2	BX355581	1.78421e+06	1.84835e+06
5	I10	BX648556-3	BX648556	1.65304e+06	2.0059e+06
5	I11	BX362821-3	BX362821	1.87032e+06	2.38635e+06
5	I12	BX648556-1	BX648556	1.75397e+06	1.62657e+06
5	I13	BX364432-1	BX364432	1764747	1.40492e+06
5	I14	BX648556-2	BX648556	2.00277e+06	1.80721e+06
5	I15	BX364432-1	BX364432	1.92978e+06	1.44156e+06
5	I16	BX648569-3	BX648569	1.87757e+06	1.58969e+06
5	I17	BX364432-2	BX364432	1.57854e+06	1.57144e+06
5	I18	BX648569-1	BX648569	1.53898e+06	1.49109e+06
5	I19	BX365986-3	BX365986	1.58931e+06	1.74497e+06
5	I20	BX648569-2	BX648569	1882149	2.18909e+06
5	I21	BX365986-1	BX365986	2.04433e+06	1.51978e+06
5	I22	BX648637-3	BX648637	2917814	2.76431e+06
5	I23	BX365986-2	BX365986	1503585	1.19683e+06
5	I24	BX648637-1	BX648637	1.44547e+06	1.33651e+06
5	J01	CD722170-1	CD722170	1207476	1.78237e+06
5	J02	CR597431-3	CR597431	1.78901e+06	1.81439e+06
5	J03	CD722170-1	CD722170	1.23053e+06	1486437
5	J04	CR597431-1	CR597431	1.35492e+06	1.14392e+06
5	J05	CD722170-2	CD722170	2.0949e+06	1.9216e+06
5	J06	CR597431-2	CR597431	1.36234e+06	981520
5	J07	CF126154-3	CF126154	1.20123e+06	1.23261e+06
5	J08	CR597960-3	CR597960	1.50061e+06	1.54945e+06
5	J09	CF126629-1	CF126629	2.31372e+06	1.6738e+06
5	J10	CR597960-1	CR597960	1.14426e+06	1.32811e+06
5	J11	CF126629-1	CF126629	1.57789e+06	1.56352e+06
5	J12	CR597960-2	CR597960	1.76093e+06	1.30576e+06
5	J13	CF126629-2	CF126629	1.83011e+06	1.71812e+06
5	J14	CR598294-3	CR598294	2.04445e+06	1.67379e+06
5	J15	CF137512-3	CF137512	1.44686e+06	60182.2
5	J16	CR598294-1	CR598294	2061452	1.68054e+06
5	J17	CF137512-1	CF137512	1.46864e+06	1.46143e+06
5	J18	CR598294-2	CR598294	1440516	1.71395e+06
5	J19	CF137512-2	CF137512	1.41916e+06	1.37993e+06
5	J20	CR598519-3	CR598519	1.56814e+06	1367829
5	J21	CF147345-3	CF147345	2.00535e+06	1.88089e+06
5	J22	CR598519-1	CR598519	1.43295e+06	1.40688e+06
5	J23	CF593672-1	CF593672	1.85482e+06	1634291
5	J24	CR598519-2	CR598519	2.47965e+06	1.57375e+06
5	K01	BX391057-3	BX391057	318650	1.90166e+06
5	K02	BX648637-2	BX648637	2.11299e+06	2159761
5	K03	BX403622-1	BX403622	2.17841e+06	1805072
5	K04	BX648657-3	BX648657	1987936	681292
5	K05	BX403622-1	BX403622	2.30329e+06	2.14891e+06
5	K06	BX648657-1	BX648657	1832860	1.78208e+06
5	K07	BX403622-2	BX403622	1.81349e+06	1.8101e+06
5	K08	BX648657-2	BX648657	1.81825e+06	1.39216e+06
5	K09	BX433886-3	BX433886	2.11402e+06	1.71927e+06
5	K10	BX648738-3	BX648738	1608647	1659425
5	K11	BX433886-1	BX433886	2.03053e+06	1.90723e+06
5	K12	BX648738-1	BX648738	2.463e+06	1.64953e+06
5	K13	BX433886-2	BX433886	1.5082e+06	2.00083e+06
5	K14	BX648738-2	BX648738	1.88795e+06	1.55016e+06
5	K15	BX438453-3	BX438453	1.93096e+06	1.72351e+06
5	K16	BX648806-3	BX648806	2.06567e+06	1.51623e+06
5	K17	BX438453-1	BX438453	1.3604e+06	1.43946e+06
5	K18	BX648806-1	BX648806	1.69556e+06	1.40842e+06
5	K19	BX438453-2	BX438453	1.46508e+06	1488952
5	K20	BX648806-2	BX648806	2.13814e+06	1.46584e+06
5	K21	BX441012-3	BX441012	1.90725e+06	1.41786e+06
5	K22	BX648990-3	BX648990	2.06634e+06	1.93583e+06
5	K23	BX441012-1	BX441012	2.04863e+06	1.60943e+06
5	K24	BX648990-1	BX648990	2.53901e+06	2.06121e+06
5	L01	CF593672-1	CF593672	767962	1312257
5	L02	CR598625-3	CR598625	1.99306e+06	1.88767e+06
5	L03	CF593672-2	CF593672	1.80711e+06	1.52921e+06
5	L04	CR598625-1	CR598625	1.54537e+06	1.47744e+06
5	L05	CF594101-3	CF594101	1.97702e+06	1461157
5	L06	CR598625-2	CR598625	1897300	1.55306e+06
5	L07	CF594101-1	CF594101	1.22324e+06	1.27202e+06
5	L08	CR599541-3	CR599541	2.04076e+06	2.01169e+06
5	L09	CF594101-2	CF594101	1.96539e+06	1.84236e+06
5	L10	CR599541-1	CR599541	1.70375e+06	1.49331e+06
5	L11	CF994282-3	CF994282	1.8199e+06	1.33284e+06
5	L12	CR599541-2	CR599541	1.80866e+06	1.38018e+06
5	L13	CF994282-1	CF994282	1480897	1.27169e+06
5	L14	CR600041-3	CR600041	1499980	1.54346e+06
5	L15	CF994282-2	CF994282	1.48003e+06	1.53308e+06
5	L16	CR600041-1	CR600041	1.6811e+06	1.52058e+06
5	L17	CK141575-3	CK141575	2.02594e+06	1.45907e+06
5	L18	CR600041-2	CR600041	1.70174e+06	1.68298e+06
5	L19	CK141575-1	CK141575	2290070	2.00495e+06
5	L20	CR600415-3	CR600415	2.22351e+06	1.90199e+06
5	L21	CK141575-2	CK141575	1.61097e+06	1.71347e+06
5	L22	CR600451-1	CR600451	1.93589e+06	1.25346e+06
5	L23	CK819206-3	CK819206	2.67695e+06	2.09074e+06
5	L24	CR600451-1	CR600451	1.95066e+06	2.09494e+06
5	M01	BX441012-2	BX441012	1.73525e+06	1213591
5	M02	BX648990-2	BX648990	1.70228e+06	1.35667e+06
5	M03	BX441483-3	BX441483	1.52713e+06	1.32835e+06
5	M04	BX649017-3	BX649017	1756088	1.92623e+06
5	M05	BX444320-1	BX444320	2.19935e+06	1.59621e+06
5	M06	BX649017-1	BX649017	1.55718e+06	1.30982e+06
5	M07	BX444320-1	BX444320	1.80963e+06	1.55086e+06
5	M08	BX649017-2	BX649017	2.29036e+06	1466239
5	M09	BX444320-2	BX444320	1.4231e+06	1.11306e+06
5	M10	CA307819-3	CA307819	2.76277e+06	1.07436e+06
5	M11	BX491165-3	BX491165	2.84216e+06	1.30191e+06
5	M12	CA307819-1	CA307819	2.36547e+06	956454
5	M13	BX502596-1	BX502596	1.88094e+06	1403827
5	M14	CA307819-2	CA307819	2.71745e+06	1.56949e+06
5	M15	BX508466-1	BX508466	1753078	1.20105e+06
5	M16	CA310671-3	CA310671	2.67665e+06	1.81899e+06
5	M17	BX508946-1	BX508946	2362799	1570946
5	M18	CA419762-1	CA419762	1.66956e+06	1.56384e+06
5	M19	BX510229-1	BX510229	2219487	1.39479e+06
5	M20	CA426799-1	CA426799	2.07758e+06	1.68665e+06
5	M21	GL3	GL3	105584	80334.7
5	M22	GL3	GL3	116888	54532.7
5	M23	GL3	GL3	128496	88915.8
5	M24	GL3	GL3	91625.8	75581.1
5	N01	CK819206-1	CK819206	723574	1.28433e+06
5	N02	CR600451-2	CR600451	1.71244e+06	1.44202e+06
5	N03	CK819206-2	CK819206	1.47514e+06	1.44783e+06
5	N04	CR600782-3	CR600782	1.68949e+06	1.60648e+06
5	N05	CN264788-3	CN264788	1399798	1.23108e+06
5	N06	CR601350-1	CR601350	1873716	1444500
5	N07	CN265155-1	CN265155	1.62095e+06	1.33233e+06
5	N08	CR601375-1	CR601375	2154967	1.25176e+06
5	N09	CN283506-1	CN283506	1815632	1.56117e+06
5	N10	CR601375-1	CR601375	1.55691e+06	1.18664e+06
5	N11	CN290841-1	CN290841	2.39456e+06	2.18392e+06
5	N12	CR601375-2	CR601375	1.97894e+06	1.49791e+06
5	N13	CN297919-1	CN297919	2.08157e+06	873266
5	N14	CR602154-3	CR602154	2.51953e+06	764783
5	N15	CN354487-1	CN354487	1658138	875823
5	N16	CR602154-1	CR602154	1.28155e+06	1054462
5	N17	CN354487-1	CN354487	2.063e+06	1.1542e+06
5	N18	CR602154-2	CR602154	1.83192e+06	1.72879e+06
5	N19	CN354487-2	CN354487	2.03476e+06	991923
5	N20	CR602380-3	CR602380	1567336	1.11621e+06
5	N21	GL3	GL3	106570	68744.9
5	N22	GL3	GL3	128556	87536.5
5	N23	GL3	GL3	120563	92452.1
5	N24	GL3	GL3	142551	94407.9
5	O01	BX537526-1	BX537526	1.97582e+06	1.33892e+06
5	O02	CA426799-1	CA426799	1.84273e+06	783225
5	O03	BX537526-1	BX537526	2176751	1.82091e+06
5	O04	CA426799-2	CA426799	1863779	1.75807e+06
5	O05	BX537526-2	BX537526	2.4596e+06	2247292
5	O06	CA430007-3	CA430007	2.37454e+06	1.89055e+06
5	O07	BX537706-3	BX537706	2.14223e+06	1.54604e+06
5	O08	CA430007-1	CA430007	2172827	1.60421e+06
5	O09	BX537706-1	BX537706	1.74456e+06	1.42554e+06
5	O10	CA430007-2	CA430007	1.82249e+06	1.74712e+06
5	O11	BX537706-2	BX537706	1.52956e+06	1.47173e+06
5	O12	CA440406-3	CA440406	2.19856e+06	1.76702e+06
5	O13	BX538249-3	BX538249	1.8981e+06	1.91929e+06
5	O14	CA454187-1	CA454187	2363140	2049347
5	O15	BX538249-1	BX538249	2.02046e+06	1362038
5	O16	CA847782-1	CA847782	2.27361e+06	1.26569e+06
5	O17	BX538249-2	BX538249	1.91047e+06	1914937
5	O18	CA941380-1	CA941380	1.64271e+06	1.96205e+06
5	O19	BX538250-3	BX538250	1.89037e+06	1.60723e+06
5	O20	CA944404-1	CA944404	2.01868e+06	1738754
5	O21	GL3	GL3	99609.2	59817.6
5	O22	GL3	GL3	140064	105631
5	O23	mock	mock	2.39425e+06	1.27568e+06
5	O24	mock	mock	1.92635e+06	1.29203e+06
5	P01	CN356362-3	CN356362	1.62287e+06	1.6205e+06
5	P02	CR602380-1	CR602380	1.47493e+06	1.47295e+06
5	P03	CN356362-1	CN356362	1.63352e+06	2.01408e+06
5	P04	CR602380-2	CR602380	1.55205e+06	2286214
5	P05	CN356362-2	CN356362	1667670	1.26887e+06
5	P06	CR602817-3	CR602817	1.84877e+06	1.61905e+06
5	P07	CN358600-3	CN358600	1.78898e+06	1.48339e+06
5	P08	CR602817-1	CR602817	1.58076e+06	1.93416e+06
5	P09	CN368109-1	CN368109	2.85684e+06	1.92224e+06
5	P10	CR602817-2	CR602817	2.66131e+06	1.67461e+06
5	P11	CN369702-1	CN369702	2.07705e+06	1.80698e+06
5	P12	CR604036-3	CR604036	1.3605e+06	1.27871e+06
5	P13	CN389990-1	CN389990	1.0342e+06	1.34078e+06
5	P14	CR604036-1	CR604036	1.4413e+06	1.4609e+06
5	P15	CR590086-1	CR590086	1328051	1.60977e+06
5	P16	CR604036-2	CR604036	1809471	1.66204e+06
5	P17	CR590086-1	CR590086	1.40258e+06	1.00897e+06
5	P18	CR604537-3	CR604537	2.26171e+06	1.8703e+06
5	P19	CR590086-2	CR590086	1.62411e+06	1.7359e+06
5	P20	CR604537-1	CR604537	2.53893e+06	2.14675e+06
5	P21	GL3	GL3	123821	80268.3
5	P22	GL3	GL3	152084	69318.5
5	P23	mock	mock	1191295	916290
5	P24	mock	mock	1.5655e+06	1.19771e+06
6	A01	CR604537-2	CR604537	1.36453e+06	1.75497e+06
6	A02	CR620153-2	CR620153	3.37464e+06	2716935
6	A03	CR606058-3	CR606058	2.30983e+06	1.64502e+06
6	A04	CR620871-3	CR620871	1.81773e+06	1.32694e+06
6	A05	CR606058-1	CR606058	2.52314e+06	1.24671e+06
6	A06	CR621291-1	CR621291	1.51301e+06	1655828
6	A07	CR606058-2	CR606058	1.54944e+06	1.64204e+06
6	A08	CR621396-1	CR621396	948084	1.56498e+06
6	A09	CR607361-3	CR607361	1.93117e+06	1.05046e+06
6	A10	CR622527-1	CR622527	1.43844e+06	2044615
6	A11	CR607361-1	CR607361	1.16697e+06	1248204
6	A12	CR622527-1	CR622527	3.38361e+06	1.52576e+06
6	A13	CR607361-2	CR607361	4157234	1224733
6	A14	CR622527-2	CR622527	1226523	2.00692e+06
6	A15	CR607695-3	CR607695	1.9148e+06	593878
6	A16	CR623722-3	CR623722	358699	903120
6	A17	CR607695-1	CR607695	1.70991e+06	1085103
6	A18	CR623722-1	CR623722	2.20551e+06	1.09921e+06
6	A19	CR607695-2	CR607695	2.12386e+06	1.43242e+06
6	A20	CR623722-2	CR623722	1.60539e+06	852516
6	A21	CR607995-3	CR607995	1.32107e+06	2431814
6	A22	CR624046-3	CR624046	1.58951e+06	1.8503e+06
6	A23	CR607995-1	CR607995	2.14903e+06	1.7399e+06
6	A24	CR624046-1	CR624046	2579175	2.3504e+06
6	B01	mock2	mock2	1.05202e+06	911795
6	B02	mock2	mock2	778140	1.23608e+06
6	B03	mock2	mock2	1.54043e+06	593885
6	B04	mock2	mock2	1.44431e+06	1.24289e+06
6	B05	mock2	mock2	1.57518e+06	841749
6	B06	mock2	mock2	905062	1.13008e+06
6	B07	mock2	mock2	1.84675e+06	1.1998e+06
6	B08	mock2	mock2	2.01717e+06	1.42408e+06
6	B09	mock2	mock2	1.62294e+06	761512
6	B10	mock2	mock2	1.03405e+06	808161
6	B11	mock2	mock2	1.35853e+06	843394
6	B12	mock2	mock2	1.6496e+06	1.07221e+06
6	B13	mock2	mock2	1.29698e+06	687338
6	B14	mock2	mock2	1.4171e+06	1.00966e+06
6	B15	mock2	mock2	1240713	867874
6	B16	mock2	mock2	1.35224e+06	1.12451e+06
6	B17	mock2	mock2	799302	945476
6	B18	mock2	mock2	1.52078e+06	575360
6	B19	mock2	mock2	995533	636831
6	B20	mock2	mock2	1.62997e+06	1.37512e+06
6	B21	mock2	mock2	2.04853e+06	906171
6	B22	mock2	mock2	1.23366e+06	998921
6	B23	mock2	mock2	1.75023e+06	776292
6	B24	mock2	mock2	1.15813e+06	629152
6	C01	CR607995-2	CR607995	1.11485e+06	658079
6	C02	CR624046-2	CR624046	2392017	1.41861e+06
6	C03	CR609180-3	CR609180	1.35733e+06	1.55371e+06
6	C04	CR624167-3	CR624167	2459271	1820274
6	C05	CR609408-1	CR609408	1.40156e+06	1.90306e+06
6	C06	CR624167-1	CR624167	1.12995e+06	1.27338e+06
6	C07	CR609408-1	CR609408	1.4065e+06	803545
6	C08	CR624167-2	CR624167	2.06659e+06	2142146
6	C09	CR609408-2	CR609408	1.6483e+06	1.16007e+06
6	C10	CR624352-3	CR624352	2240852	1950082
6	C11	CR609778-3	CR609778	2.21364e+06	1.05873e+06
6	C12	CR624352-1	CR624352	899567	237082
6	C13	CR609778-1	CR609778	1.72135e+06	1.06061e+06
6	C14	CR624352-2	CR624352	1.52106e+06	1.59649e+06
6	C15	CR609778-2	CR609778	1.768e+06	2.29327e+06
6	C16	CR624641-3	CR624641	818634	1.94689e+06
6	C17	CR609780-3	CR609780	1.18436e+06	2465542
6	C18	CR624641-1	CR624641	1721883	746813
6	C19	CR609780-1	CR609780	1.7147e+06	956926
6	C20	CR624641-2	CR624641	2.45558e+06	3.56549e+06
6	C21	CR609780-2	CR609780	1.86041e+06	2.3885e+06
6	C22	CR624922-3	CR624922	1.52728e+06	724999
6	C23	CR609953-3	CR609953	2.91977e+06	1.26399e+06
6	C24	CR624922-1	CR624922	2.30594e+06	1.34229e+06
6	D01	mock2	mock2	871037	1.0541e+06
6	D02	mock2	mock2	1.63471e+06	570752
6	D03	mock2	mock2	1783075	1.12581e+06
6	D04	mock2	mock2	595162	936443
6	D05	mock2	mock2	1.05147e+06	1.19092e+06
6	D06	mock2	mock2	1.3019e+06	432926
6	D07	mock2	mock2	1.36781e+06	745558
[truncated: 305 more rows]

## Sheet: Legend
Description of columns:
plate	Number of microtiter plate (1-6)
well	Well in microtiter plate
siRNA	siRNA id
GL3	siRNA against luciferase
mock	no siRNA
mock2	no siRNA, leftover wells on plate 6
target	Accession number of target transcript
replicate 1	Raw signal for replicate 1
replicate 2	Raw signal for replicate 2
NA	Indicates masked-out poor-quality signals (mostly due to spatial effects on plates).
